1

2       **The Synaptonemal Complex Central Region Modulates**  
3       **Crossover Pathways and Feedback Control of Meiotic**  
4       **Double-strand Break Formation**

5

6       Min-Su Lee,<sup>1,5</sup> Mika T. Higashide,<sup>2,5</sup> Hyungseok Choi,<sup>1</sup> Ke Li,<sup>2,3</sup> Soogil Hong,<sup>1</sup> Kangseok

7

      Lee,<sup>1</sup> Akira Shinohara,<sup>2</sup> Miki Shinohara,<sup>2,3,4,\*</sup> Keun P. Kim<sup>1,\*</sup>

8

9       <sup>1</sup>Department of Life Science, Chung-Ang University, Seoul 06974, South Korea

10      <sup>2</sup>Institute for Protein Research, Osaka University, Osaka 565-0871, Japan

11      <sup>3</sup>Graduate School of Agriculture, Kindai University, Nara 631-8505, Japan

12      <sup>4</sup>Agricultural Technology and Innovation Research Institute, Kindai University, Nara 631-  
13      8505, Japan

14

15      <sup>5</sup>These authors contributed equally to this work.

16      \*Corresponding authors

17      E-mail: mikis@nara.kindai.ac.jp; Phone: +81-742-43-6518; Fax: +81-742-43-8976

18      E-mail: kpkim@cau.ac.kr; Phone: +82-2-820-5792; Fax: +82-2-820-5206

19

20

21

22

23

24

25

26

## 27 **Summary**

28 The synaptonemal complex (SC) is a proteinaceous structure that mediates homolog  
29 engagement and genetic recombination during meiosis. Zip-Mer-Msh (ZMM) proteins  
30 promote crossover (CO) formation and initiate SC formation. In SC elongation, the  
31 SUMOylated SC component Ecm11 and its interacting protein Gmc2 facilitate the  
32 polymerization of Zip1, a SC-central region component in budding yeast. Through physical  
33 recombination, cytological, and genetic analyses, we here demonstrate that *ecm11* and  
34 *gmc2* mutants exhibit chromosome-specific defects in meiotic recombination. CO  
35 frequencies were reduced on a short chromosome (chromosome III), whereas CO and non-  
36 crossover (NCO) frequencies were increased on a long chromosome (chromosome VII).  
37 Further, persistent double-strand breaks (DSBs) occurred in unsynapsed chromosome  
38 regions during the late prophase, suggesting the presence of a negative regulation of DSB  
39 formation. The Ecm11-Gmc2 (EG) complex could participate in joint molecule (JM)  
40 processing and/or double-Holliday junction resolution for CO-designated recombination of  
41 the ZMM-dependent pathway. However, absence of the EG complex ameliorated the JM-  
42 processing defect in *zmm* mutants, suggesting a role of these proteins in suppression of  
43 ZMM-independent recombination. Therefore, the EG complex fosters ZMM-dependent  
44 processing and resolution of JMs while suppressing ZMM-independent JM processing and  
45 late DSB formation. Hence, EG-mediated SC central regions, which display properties  
46 similar to those of liquid crystals, may function as a compartment for sequestering  
47 recombination proteins in and out of the process to ensure meiosis specificity during  
48 recombination.

49

50 Keywords: meiosis, synaptonemal complex, crossover, DNA double-strand breaks, Ecm11-  
51 Gmc2

52

53

54

## 55 **Introduction**

56 During meiosis, pairs of homologous chromosomes (“homologs”) undergo dynamic structural  
57 changes and recombination, which is initiated by the formation of programmed DNA double-  
58 strand breaks (DSBs). Meiotic recombination is specialized for creating physical connections  
59 between homologs, which ensures accurate homologous parental chromosome segregation  
60 during the first meiotic division, leading to genetic diversity in a population. Defects in any  
61 meiotic recombination process may cause meiotic failure, gamete aneuploidy, and genetic  
62 abnormalities ([Hunter, 2015](#)).

63 In many organisms, the formation of meiotic DSBs is catalyzed after meiotic DNA  
64 replication at meiotic prophase I by the topoisomerase VI-like protein Spo11 ([Lam and](#)  
65 [Keeney, 2014](#); [Robert et al., 2016](#)). DSB ends subsequently undergo extensive nucleolytic  
66 resection to expose a 3'-single-stranded overhang of approximately 800 nucleotides, which  
67 is required for homology searching ([Cannavo et al., 2013](#); [Garcia et al., 2011](#); [Mimitou et al.,](#)  
68 [2017](#)). The “first” DSB end recombines and exchanges with a homolog chromatid through a  
69 process mediated by the RecA homologs Dmc1 and Rad51, and forms a nascent D-loop that  
70 is expanded into the recombination intermediate single-end invasion (SEI) ([Cloud et al.,](#)  
71 [2012](#); [Hong et al., 2013](#); [Lao et al., 2013](#); [Liu et al., 2014](#); [Hong et al., 2019a](#)). The “second”  
72 DSB end is thought to engage with the displaced strand of the SEI and produces a double-  
73 Holliday junction (dHJ). Interhomolog-dHJs (IH-dHJs) specifically resolve into IH crossover  
74 (CO) products; otherwise, the repair of IH non-CO-designated breaks and intermediates via  
75 homologs yields non-crossover (NCO) products ([Allers and Lichten, 2001](#); [Börner et al.,](#)  
76 [2004](#)).

77 Meiotic chromosome axes are organized into a linear array of loops with each pair of  
78 tightly conjoined sister chromatids being linked along their entire length to form  
79 synaptonemal complexes (SCs) ([Page and Hawley, 2004](#)). SCs are meiosis-specific zipper-  
80 like proteinaceous structures, comprising axial/lateral elements and a central element that

81 interconnects the axial/lateral elements. A group of proteins known as ZMM proteins (Zip1-3,  
82 Spo22/Zip4, Mer3, Msh4, Msh5, and Spo16) initiate SC formation, which is coupled to CO  
83 formation ([Agarwal and Roeder, 2000](#); [Börner et al., 2004](#); [Chua and Roeder, 1998](#);  
84 [Pyatnitskaya et al., 2019](#); [Shinohara et al., 2008](#); [Tsubouchi et al., 2006](#)). ZMM proteins can  
85 be classified into three subgroups based on chromosomal and functional criteria ([Lynn et al.,](#)  
86 [2007](#)). Subgroup I includes Mer3 and Msh4-Msh5 (MutS $\gamma$ ), which play a role in diverse DNA  
87 repair activities. Subgroup II includes Zip2, Zip3, Zip4/Spo22, and Spo16 (ZZSS), which form  
88 the synapsis initiation complex (SIC) to initiate nucleation of the SC. Subgroup III includes  
89 Zip1, which contains a coiled-coil domain and a globular domain that correspond to the  
90 transverse filament component of the SC. The SC components are involved in  
91 reorganization of the recombination complexes (“recombinosomes”) of the SC central region  
92 ([Lynn et al., 2007](#)). In the absence of ZMM proteins, NCOs occur at high frequencies,  
93 whereas CO-designated products and CO formation are strongly defective ([Börner et al.,](#)  
94 [2004](#)). This observation led to the proposal that ZMM proteins are required for the  
95 stabilization of recombination intermediates needed to capture the second DSB end into a  
96 dHJ, which is then resolved as a CO product. Recombinosomes bind to the regions between  
97 the axes and mediate diverse recombination progressions, including homolog partner choice  
98 and presynaptic homolog co-alignment in the presence of sister chromatids ([Pyatnitskaya et](#)  
99 [al., 2019](#)). Chromosome axis proteins of the Red1/Mek1/Hop1 complex are required for  
100 normal levels of DSBs and for the preferential progression of recombination to form IH  
101 recombinants mediated by the RecA homologs Rad51 and Dmc1 ([Kim et al., 2010](#); [Hong et](#)  
102 [al., 2013](#); [Lao et al., 2013](#)). Therefore, axis/SC/recombinosome associations are highly  
103 ordered, and homolog pairing persists throughout the CO-fated recombination process  
104 ([Zickler and Kleckner, 2015](#)).

105         Once CO/NCO differentiation has occurred in the early prophase, progression to the  
106 CO fate involves the production of stable joint molecules (JMs) such as SEI and dHJ  
107 intermediates in a ZMM-dependent manner. ZMM-dependent COs, which are often called

108 “type I” COs, exhibit a non-random distribution on chromosomes with positive interference.  
109 Some fractions of meiotic DSBs are repaired through a ZMM-independent pathway, which  
110 shows random resolution of the Holliday structures yielding both CO and NCO products. The  
111 ZMM-independent COs are called “type II” COs and do not show interference. Additionally,  
112 dHJs are processed into NCOs through dissolution, which involves the branch migration of  
113 HJs. During meiosis, the ZMM-independent pathways seem to be suppressed relative to  
114 ZMM-dependent pathways and are thus regulated. However, the molecular nature of this  
115 suppression remains unknown.

116 Multiple feedback controls are capable of downregulating DSBs in order to maintain  
117 the proper number and distribution of the DSBs, and thereby managing the recombination  
118 events ([Keeney et al., 2014](#); [Thacker et al., 2014](#)). The fact that *zmm* mutants demonstrate  
119 elevated DSB formation during late meiotic prophase I suggests that homolog engagement  
120 regulates the number and distribution of DSB by displacement of Spo11 accessory factors  
121 such as Rec114 ([Thacker et al., 2014](#); [Anderson et al., 2015](#); [Mu et al., 2020](#)). However, it is  
122 not clear whether homolog engagement *per se* or ZMM proteins directly downregulate late  
123 meiotic DSB formation.

124 Small Ubiquitin-like MOdifier (SUMO) plays a role in SC formation ([Watts and](#)  
125 [Hoffmann, 2011](#)). In budding yeast, sumoylation of the SUMO E2-conjugation enzyme Ubc9  
126 is involved in SC assembly and associates with various SC proteins, including the SUMO E3  
127 ligase Zip3 ([Cheng et al., 2006](#); [Hooker and Roeder, 2006](#); [Serrentino et al., 2013](#)). Several  
128 lines of evidence suggest that SUMOylation of Ecm11, which forms a complex with Gmc2, is  
129 important for Zip1 assembly between homologs and that the Ecm11-Gmc2 (EG) complex  
130 functions as a component of the SC central region. SUMOylated Ecm11 at early prophase I  
131 localizes to the synapsis initiation complex (SIC) in a Gmc2-dependent manner ([Humphryes](#)  
132 [et al., 2013](#); [Voelkel-Meiman et al., 2013](#)). However, the role of SC central regions is less  
133 well-defined. Furthermore, SUMOylated Ecm11 localizes to a discrete region of the central  
134 element domain that is associated with Zip1 N-termini and limits excess MutS $\gamma$ -mediated CO

135 formation (Voelkel-Meiman et al., 2015; Voelkel-Meiman et al., 2016). Nevertheless, the  
136 underlying functions of EG complex-mediated SC central regions during meiosis remain  
137 elusive.

138 To better define the interplay between homolog engagement and recombination, we  
139 further evaluated the regulatory roles of the EG complex in DSB formation and the control of  
140 CO-designated DSBs using physical, genetic, and cytological analyses. The results revealed  
141 that the EG complex could promote JM processing and/or dHJ resolution for CO-designated  
142 recombination. Interestingly, mutation of *ecm11* and *gmc2* resulted in reduced processing of  
143 the JMs in the presence of ZMM, whereas *ecm11* and *gmc2* mutants that lacked ZMM were  
144 able to effectively process JMs. Moreover, the *ecm11* and *gmc2* deletion mutants showed  
145 increased DSB formation, particularly on a long chromosome during late prophase I,  
146 suggesting that EG complex-mediated SC polymerization was involved in the feedback  
147 control of DSB formation in a chromosome length-dependent manner. Therefore, these  
148 results reveal multiple roles for the EG complex in the control of late DSB formation, ZMM-  
149 dependent processes that directly regulate type I (interfering) CO-designated DSB repair,  
150 and suppression of ZMM-independent recombination (type II, non-interfering COs). We  
151 discuss the regulatory role of the EG complex-mediated assembly of the SC central region,  
152 which exhibited liquid-crystal properties in these processes.

153

## 154 **Results**

### 155 **A *gmc2* mutant shows hyper-recombination on chromosome VII**

156 Previous studies have indicated that the EG complex is necessary for efficient Zip1  
157 assembly, which promotes the pairing of a homologous chromosome and SC during meiotic  
158 prophase I (Humphryes et al., 2013; Voelkel-Meiman et al., 2013). Furthermore, genetic  
159 analysis of *ecm11* and *gmc2* deletion mutants (*ecm11 $\Delta$*  and *gmc2 $\Delta$* , respectively)  
160 demonstrated increased CO frequencies within intervals of chromosomes III and VIII of the  
161 yeast strain BR1919-8B (Voelkel-Meiman et al., 2016). Therefore, we first analyzed the

162 frequencies of CO and non-CO (non-Mendelian segregation) on chromosomes III and VII in  
163 an SK1 background (Higashide and Shinohara, 2016), which revealed synchronous meiosis,  
164 as well as on chromosome V in a congenic background (Figure 1A). Consistent with the  
165 findings of Voelkel-Meiman et al. (2016), *gmc2Δ* exhibited elevated CO frequencies in four  
166 intervals of chromosome VII and in one interval of chromosome III (Figure 1B). In contrast,  
167 CO frequencies on two intervals of chromosome III and on one interval of chromosome V in  
168 the *gmc2Δ* mutant were similar to those in the wild-type (WT) yeast strain (Figure 1B). One  
169 interval of chromosome III and two intervals of chromosome V showed a slight reduction in  
170 CO frequencies relative to that in the WT. Most of the loci of the three chromosomes showed  
171 more or less increased frequencies of non-Mendelian segregation (Figure 1D). The increase  
172 in CO frequencies on the loci of chromosome VII in the *gmc2Δ* mutant was more prominent  
173 than that of chromosomes III and V (Figure 1C). When CO interference was examined using  
174 nonparental ditype (NPD) ratios, all intervals in the *gmc2Δ* mutant showed decreased CO  
175 interference (increased NPD ratios) relative to those in the WT control (Supplemental Figure  
176 1). These results confirmed that the EG complex plays a role in regulating the frequencies  
177 and distribution of COs, which may be specific to chromosome properties such as a length.

178

179 **The EG complex is not required for DSB formation but is necessary for CO-specific**  
180 **recombination at *HIS4LEU2***

181 **CO-specific defect**

182 To further investigate the role of the EG complex in meiotic recombination, we used  
183 *ecm11Δgmc2Δ* single and double mutant strains to analyze recombination intermediates  
184 and outcomes at the *HIS4LEU2* locus on chromosome III, which contains a well-controlled  
185 single DSB site (Figure 2A). The *ecm11Δ* and *gmc2Δ* mutants showed substantial delays in  
186 meiotic division progression by approximately 2 h with approximately 85% of the cells  
187 undergoing meiosis (Supplemental Figure 2A). Moreover, the resultant tetrads yielded high

188 levels of four-viable tetrads, 84% for *ecm11Δ*, 88% for *gmc2Δ*, and 84% for *ecm11Δ gmc2Δ*  
189 (Supplemental Figure 2B). This finding was consistent with previous results (Humphryes et  
190 al., 2013; Voelkel-Meiman et al., 2016). Cell samples of synchronized meiosis cultures were  
191 collected at selected time points and subjected to physical analysis for recombination. *XhoI*  
192 restriction-site polymorphisms in the *HIS4LEU2* hotspot on chromosome III produced DNA  
193 species for DSBs, SEIs, dHJs, and CO products (Figure 2 and Figure 3) as previously  
194 described (Oh et al., 2009; Kim et al., 2010; Börner et al., 2004; Hong et al., 2019b). DSBs  
195 and COs were evaluated using one-dimensional gel electrophoresis followed by Southern  
196 hybridization. COs and NCOs were distinguished by gene conversion of *BamHI* and *NgoMV*  
197 restriction enzyme sites inserted close to the DSB sites at the *HIS4LEU2* locus (Figure 2B,  
198 2D, and 2E). For all physical analyses, radiolabeled probes were used to detect hybridized  
199 DNA species.

200 In the WT species, DSBs appeared and disappeared, followed by the formation of  
201 CO products. DSBs in the WT peaked at 3 h and were eventually processed by 8 h (Figure  
202 2B and 2C). The frequency of occurrence of COs (CO-I) and NCOs (NCO-I) was  
203 approximately 5% and 4%, respectively (Figure 2D and 2E). The kinetics of DSBs were very  
204 similar between the WT and *ecm11Δ/gmc2Δ* strains with respect to the timing as well as  
205 maximum levels (Figure 2C). The *ecm11Δ* and *gmc2Δ* single and *ecm11Δ gmc2Δ* double  
206 mutants all formed COs (COs in Figure 2C; Figure 4C; Supplementary Figure 3) at  $14.9 \pm$   
207  $1.9\%$ ,  $13.6 \pm 1.4\%$ , and  $13.7 \pm 1.9\%$ , respectively, whereas COs occurred at a frequency of  
208  $16.8 \pm 1.8\%$  in the WT strain. This indicated a modest reduction in CO frequencies in the  
209 *ecm11Δ* and *gmc2Δ* mutant strains. However, total NCO levels were similar to those of the  
210 WT strain ( $\sim 8.7\%$ ) (Supplementary Figure 3). Moreover, CO formation in the mutants  
211 exhibited an approximate 2-h delay relative to that of the WT strain. In contrast, NCO  
212 formation in the mutants occurred with similar timing to that of the WT, suggesting that CO  
213 formation was uncoupled from NCO formation in the mutants (Figure 2D). Therefore, in the  
214 *ecm11Δ* and *gmc2Δ* mutants, meiotic DSBs at *HIS4LEU2* formed at WT levels with normal



215 post-DSB progression, CO-fated DSB repair suffered from aberrant defects, and NCO  
216 formation progressed normally.

### 217 **DSB frequencies**

218 DSBs occurred on approximately 20% of chromatids at the *HIS4LEU2* locus, as estimated in  
219 a background strain (*rad50S*) where they failed to progress to form recombinants (Figure 2F;  
220 Supplementary Figure 4). In the *rad50S* background, the *ecm11Δ* and *gmc2Δ* mutants  
221 exhibited similar levels of DSBs at the *HIS4LEU2* locus. This was also confirmed in a *dmc1Δ*  
222 background where the DSB turnover was blocked (Supplementary Figure 5). This indicated  
223 that the mutations did not affect DSB formation at the *HIS4LEU2* locus during early meiosis.

### 224 **Defects of SEI-dHJ transition and dHJ resolution**

225 In all single and double *ecm11Δ gmc2Δ* mutants, DSBs formed at the *HIS4LEU2* locus with  
226 WT timing and eventually appeared to turnover similar to the WT strain (Figure 2C).  
227 However, CO formation in the mutants was delayed by approximately 2 h and CO levels  
228 reached only 80% of the WT levels, indicating a defect in JM processing to progress and  
229 form COs (Figure 2C). To confirm the JM-to-CO transition defects, we analyzed SEIs and  
230 dHJs using a native/native two-dimensional gel electrophoresis analysis followed by  
231 Southern hybridization. This revealed branched JMs of the recombination intermediates, in  
232 which IH JMs and intersister (IS) JMs could be distinguished (Figure 3A).

233 For the WT strain, SEIs and dHJs became detectable by 2D gel electrophoresis at  
234 3.5 h and reached peak levels at 4 h with an IH:IS dHJ ratio of approximately 5:1. In the  
235 *ecm11Δ* and *gmc2Δ* mutants, SEIs and dHJs appeared at normal times and peaked at 6 h  
236 with a 2.5-h delay compared to those of the WT strain (Figure 3B; Supplementary Figure 6).  
237 Although SEIs and dHJs exhibited higher steady-state levels in *ecm11Δ*, *gmc2Δ*, and  
238 *ecm11Δ gmc2Δ* cells between 5 h and 8 h relative to those in the WT, large portions of these  
239 JMs disappeared after 8 h (Figure 3B). However, unresolved SEI and dHJ species persisted  
240 in the *ecm11Δ* and *gmc2Δ* mutants at later times, which may have caused a defect in

241 pachytene exit, and thus delayed the onset of meiosis I. The *ecm11Δ* and *gmc2Δ* mutants  
242 exhibited an IH:IS dHJ ratio of approximately 5.5:1, indicating normal IH bias in the mutants  
243 (Figure 3B). Overall, these results suggested that *ecm11Δ*, *gmc2Δ*, and *ecm11Δ gmc2Δ* cells  
244 showed both a normal DSB-SEI transition and normal IH-bias, but had a defect in SEI-dHJ  
245 transition and/or dHJ resolution at the *HIS4LEU2* locus. Alternatively, these mutants may  
246 have formed more SEIs and dHJs, which could have resulted from more frequent DSB  
247 formation than what is observed in the WT strain.

248 To distinguish between these two possibilities, we examined the total number of  
249 dHJs in the *ecm11Δ* and *gmc2Δ* mutants in an *ndt80Δ* background, which causes meiotic  
250 cells to arrest in middle pachytene leading to the accumulation of SEIs and dHJs (Allers and  
251 Lichten 2001). The steady-state levels of dHJs at the *HIS4LEU2* locus in the  
252 *ecm11Δ ndt80Δ*, *gmc2Δ ndt80Δ*, and *ecm11Δ gmc2Δ ndt80Δ* mutants were similar to those in  
253 the *ndt80Δ* mutant ( $6.4 \pm 0.8\%$  in *ndt80Δ*,  $6.2 \pm 0.8\%$  in *ndt80Δ ecm11Δ*,  $6.5 \pm 1.3\%$  in  
254 *ndt80Δ gmc2Δ*, and  $6.4 \pm 1.0\%$  in *ndt80Δ ecm11Δ gmc2Δ*; Figure 3C and 3D). This  
255 supported the hypothesis that the EG complex plays a positive role in SEI-dHJ transition  
256 and/or dHJ resolution, rather than in the regulation of JM frequencies.

257

### 258 ***ecm11Δ* and *gmc2Δ* mutants demonstrate a locus-specific defect in DSB processing**

259 As the effect of *ecm11Δ* and *gmc2Δ* mutations in meiotic recombination differed for  
260 chromosomes III and VII (Figure 1), we further analyzed meiotic recombination at the *ERG1*  
261 locus, which was identified as a natural hotspot in chromosome VII (Figure 4A). In contrast  
262 to the *HIS4LEU2* locus, the *ecm11Δ* and *gmc2Δ* mutants exhibited >2-fold increase in both  
263 CO and NCO at the *ERG1* locus (Figure 4A–4E). We then monitored JM formation at the  
264 *ERG1* locus using 2D gel electrophoresis and quantified the levels of JM species from  
265 parallel cultures of WT and *ecm11Δ* and *gmc2Δ* mutant cells (Figure 4F–4H; Supplementary  
266 Figure 7). The initiation time of JM formation in the mutants was similar to that in the WT

267 strain, but the peak levels of SEIs and dHJs were approximately 3-fold higher in the *ecm11Δ*  
268 and *gmc2Δ* mutants (Figure 4H; Supplementary Figure 7). We then further analyzed JM  
269 formation at the *ERG1* locus in an *ndt80Δ* background. Interestingly, dHJ levels were  
270 increased from  $2.65 \pm 0.6\%$  in *ndt80Δ* to  $4.1 \pm 0.5\%$ ,  $4.3 \pm 0.4\%$ , and  $4.3 \pm 0.2\%$  in the  
271 *ndt80Δ ecm11Δ*, *ndt80Δ gmc2Δ*, and triple mutants, respectively (Figure 4I and 4J).  
272 Therefore, in an *ndt80* background, the *ecm11Δ* and *gmc2Δ* mutants showed approximately  
273 1.5–1.6-fold higher levels of dHJ relative to those in the control. This indicated an increased  
274 DSB event leading to JM formation. Thus, we interpreted these findings to signify that  
275 *ecm11Δ* and *gmc2Δ* mutants exhibited a combination of two defects in recombination at the  
276 *ERG1* locus. One defect resulted in increased JM formation (more establishment), while the  
277 other defect was in the SEI-dHJ transition and/or dHJ resolution (defective maintenance).  
278 The former defect was seen only for the *ERG1* locus but not for the *HIS4LEU2* locus. We  
279 further found that the *ecm11Δ* and *gmc2Δ* mutants showed slightly higher steady-state levels  
280 of DSBs at the *ERG1* locus relative to that of the WT (Supplementary Figure 8). In contrast,  
281 the levels of DSBs at the *ERG1* locus in the *ecm11Δ rad50S* and *gmc2Δ rad50S* mutants  
282 were similar to those in the *rad50S* mutant (Supplementary Figure 4).

283

#### 284 **Early DSB formation is not affected by the absence of the EG complex**

285 As noted above, elevated meiotic recombination in the *ecm11Δ* and *gmc2Δ* mutants may  
286 have been caused by increased initiation events associated with DSB formation. Using  
287 immunofluorescence analysis of chromosome spreads, we counted the number of foci of  
288 recombination proteins, such as Rad51 and Dmc1, as well as the number of ZMM foci such  
289 as Zip3 (Supplementary Figure 9). Foci formation by Rad51/Dmc1 and Zip3 in the *ecm11Δ*  
290 and *gmc2Δ* mutants began in a similar manner to that in the WT strain. However, the foci  
291 persisted longer on the chromosomes of the *ecm11Δ* and *gmc2Δ* mutants than on those of  
292 the WT strain, consistent with the delayed processing of recombination intermediates

293 (Supplementary Figures 9).

294 We also checked the steady-state levels of DSBs at other loci, including *CYS3*  
295 (chromosome I), *ARG4* (chromosome VIII), and *BUD23* (chromosome III), in *rad50S* and  
296 *dmc1Δ* backgrounds (Supplementary Figures 4 and 5). The *ecm11Δ* and *gmc2Δ* mutants  
297 showed similar DSB levels as the control strain at these three loci. These findings suggested  
298 that the EG complex does not play a role in DSB formation in early meiotic prophase I.

299

### 300 **EG complex restricts persistent DSB formation independent of Ndt80**

301 It was previously reported that homolog engagement suppresses DSB formation in late  
302 prophase I (Thacker et al., 2014). In addition, pachytene exit mediated by Ndt80 also  
303 regulates DSB formation, which is independent of homolog engagement suppression  
304 (Thacker et al., 2014). We determined DSB levels in the absence of Ndt80 by quantifying  
305 Spo11-oligo complexes in a *gmc2Δ* background, which resulted in defective homolog  
306 engagement (Figure 5A and 5B). In WT cells, Spo11-oligos appeared and disappeared with  
307 a peak at 5 h. The *ndt80Δ* mutant exhibited persistent Spo11-oligos at late time points,  
308 consistent with the previous results (Thacker et al., 2014). Importantly, *gmc2Δ ndt80Δ* cells  
309 had increased levels of Spo11-oligos, with the increase being approximately 1.7-fold at 8 h  
310 compared to the levels in the *ndt80Δ* single mutant (Figures 5A and 5B). Consistent with this,  
311 Keeney and colleagues reported increased steady-state levels of Spo11-oligos in *gmc2Δ*  
312 and *ecm11Δ* mutants in a WT background, with the increased levels being more prominent  
313 at later times (Mu et al., 2020). These findings suggest that a greater degree of DSB  
314 formation occurs in late prophase I in *gmc2Δ*, which might be related to a homolog-  
315 engagement defect in the mutant. This phenomenon appears to be independent of Ndt80-  
316 mediated pachytene exit. Sgs1 mutations promote chromosome synapsis in some synapsis-  
317 defective mutants called psuedosynapsis (Rockmill, 2003). Indeed, *sgs1-Δ200* mutation  
318 suppressed synapsis defects in *gmc2Δ* (Supplementary Figure 10). We evaluated whether

319 pseudosynapsis could suppress DSB formation in the *gmc2Δ* mutant. However, Spo11-oligo  
320 complexes were increased approximately 1.7-fold in *sgs1-Δ200 gmc2Δ ndt80Δ* as seen in  
321 *gmc2Δ ndt80Δ* (Supplementary Figure 10). This suggested that the roles of the EG complex  
322 in suppression of DSB formation could not be replaced by pseudosynapsis.

323

### 324 **EG complex regulates COs on long chromosomes**

325 To determine the roles of the EG complex on pachytene chromosomes, we analyzed CO  
326 and synapsis formation at meiotic prophase I in the absence of Ndt80 and/or Gmc2 by  
327 immunostaining of chromosome spreads. The number of Rad51 foci was slightly increased  
328 and was maintained at late meiotic prophase in the *gmc2Δ ndt80Δ* double mutant compared  
329 with that in the *ndt80Δ* single mutant (Figure 5C). We also visualized Zip3 and Msh5  
330 localization to detect CO formation in late prophase in the absence of Ndt80 and/or Gmc2.  
331 The number of Zip3 and Msh5 foci was similar in the *ndt80Δ* and *gmc2Δ ndt80Δ* mutants in  
332 late prophase (Figure 5D and 5E). However, more DSBs were produced in the mutants  
333 (Figure 5B). This implied that the *gmc2Δ* mutant produced additional DSBs in the late  
334 meiotic prophase, although these did not contribute to the total number of Zip3/Msh5-  
335 dependent recombinants in meiotic prophase I in an *ndt80Δ* background. It is likely that the  
336 additional DSBs in late meiosis of the mutant were repaired through a pathway that did not  
337 require Zip3/Msh5-focus formation.

338 To further explore the role of the EG complex in regulating CO control in a  
339 chromosome-dependent manner, bivalent length in an *ndt80Δ* background was revealed by  
340 staining for Red1, which localized to the chromosome axis at prophase, and was measured  
341 (Figure 5F). The total bivalent length indicated by Red1 lines in a single spread in *gmc2Δ*  
342 *ndt80Δ* was similar to that in *ndt80Δ* ( $P = 0.64$ ; Figure 5G). This implied that normal axis  
343 formation occurred in the absence of Gmc2. We then measured the inter-distance of two  
344 adjacent Zip3 foci on a bivalent (Figure 5H) and counted the number of Zip3 foci per bivalent

345 (Figure 5I). Bivalent length was classified for detectable Red1 signals according to  
346 chromosome length as follows: (1) short chromosomes (<30 pixels), (2) medium  
347 chromosomes (30–60 pixels), and (3) long chromosomes (>60 pixels) (Figures 5H and 5I).  
348 The short- and medium-length chromosomes displayed similar inter-distances between Zip3  
349 foci and had a comparable number of foci per bivalent in the *ndt80Δ* and *gmc2Δ*  
350 *ndt80Δ* mutant strains ( $P = 0.57$  and  $P = 0.78$ ; respectively). Importantly, long chromosomes  
351 exhibited an increased inter-Zip3 distance in *gmc2Δ ndt80Δ* (more variation) compared with  
352 those in *ndt80Δ* ( $P < 0.001$ ; Figure 5H). Furthermore, when the Zip3 foci number per bivalent  
353 was plotted against the chromosome length, the long chromosomes in *gmc2Δ ndt80Δ*  
354 showed a reduced Zip3 number compared with those in the control (Figure 5I). This  
355 suggested that ZMM-dependent events were less frequent on longer chromosomes in  
356 *gmc2Δ ndt80Δ* relative to that on other chromosomes. Therefore, we hypothesized that the  
357 high levels of COs on long chromosomes might have been caused by ZMM-independent  
358 recombination that originated in response to additional DSB formation, ultimately indirectly  
359 affecting the Zip3 foci number and distance.

360

### 361 **Absence of the EG complex suppresses the DSB turnover defect with *zip3* mutation**

362 To further explore the EG complex in regulating CO formation, recombination intermediates  
363 of the *ecm11Δ* and *gmc2Δ* mutants, along their turnover, were determined in a *zip3Δ*  
364 background (Figure 6). In *zip3Δ* cells, DSBs remained at high levels at approximately 10–24  
365 h at the *HIS4LEU2* locus (Figures 6A–6C), which was consistent with the findings of a  
366 previous report (Börner et al., 2004). Consistently, 2D gel analysis revealed that residual  
367 JMs still appeared at 24 h in *zip3Δ* (Figures 6D and 6E). By contrast, only low levels of DSBs  
368 were detected at approximately 10–24 h, and JMs were efficiently processed in *zip3Δ* cells  
369 without the EG complex (Figure 6C and 6E). Therefore, absence of the EG complex seemed  
370 to promote stalling of the DSB and/or JM processing in the *zip3Δ* mutant. Consistent with JM

371 processing, COs accumulated to higher levels in all of the *ecm11Δ zip3Δ*, *gmc2Δ zip3Δ*, and  
372 *ecm11Δ gmc2Δ zip3Δ* mutants relative to those in the *zip3Δ* single mutant (Figure 6B).  
373 Consistent with the ability of double mutants to efficiently repair DSBs, meiotic divisions in  
374 the *ecm11Δ* and *gmc2Δ* mutants in a *zip3Δ* background occurred much earlier than those in  
375 the *zip3Δ* single mutant, implying that the absence of the EG complex partly ameliorated the  
376 defect in recombination progression caused by the absence of Zip3. Similar suppression of  
377 DSB-repair defects in the *zip3Δ* mutant by *ECM11* and/or *GMC2* deletion was observed at  
378 natural hotspots, including *ARG4*, *CYS3*, and *ERG1* loci (Supplementary Figure 11). Taken  
379 together, these results indicate that the EG complex could suppress recombination in the  
380 absence of Zip3, suggesting dual functions for the EG complex, i.e., promoting Zip3-  
381 dependent JM processing and suppressing Zip3-independent processing. Similar data were  
382 obtained when a *zip1* mutant was used instead of the *zip3* mutant (Supplementary Figure  
383 12).

384

### 385 **Suppression of recombination progression delays in *ecm11Δ* and *gmc2Δ* mutants**

#### 386 **Low temperature alleviated progression delays**

387 A previous study showed that high temperature introduces a kinetic block with respect to JM  
388 processing in the absence of ZMM, such as in case of *zip3Δ* (Börner et al., 2004). Therefore,  
389 we wondered whether temperature could affect the recombination defects in the *ecm11Δ*  
390 and *gmc2Δ* mutants, and evaluated the mutant phenotypes at a low temperature of 23°C  
391 (Supplementary Figure 13). Similar to the findings at 30°C, the *ecm11Δ* and *gmc2Δ* mutants  
392 exhibited reduced CO levels at the *HIS4LEU2* locus at 23°C without affecting the NCOs. In  
393 contrast, JMs did not accumulate at higher levels in the mutants compared to those in the  
394 WT strain at 23°C, and disappeared at later time points (Supplementary Figure 13). This  
395 indicated that low temperature suppressed the JM-processing defects in the *ecm11Δ* and  
396 *gmc2Δ* mutants. In other words, the kinetic barrier imposed by the EG complex is sensitive

397 to temperature.

398

### 399 **JM resolution under conditions of Cdc5 activation**

400 It was previously shown that Cdc5, whose expression is induced by pachytene exit,  
401 promotes not only the disassembly of the SC and breakdown of SC proteins but also the  
402 resolution of the JMs to proceed to CO (Sourirajan and Lichten, 2008). The *ecm11Δ* and  
403 *gmc2Δ* mutants were defective in SC formation and in the JM-to-CO transition, which may  
404 induce checkpoint activation leading to suppressed *CDC5* expression. We hypothesized that  
405 ectopic expression of Cdc5 could induce an efficient resolution of CO intermediates in the  
406 *ecm11Δ* and *gmc2Δ* mutants. We evaluated recombination progression using specific  
407 conditional alleles in which the *CUP1* promoter was strongly activated in the presence of  
408 CuSO<sub>4</sub> and replaced the normal promoter of *CDC5* (Supplementary Figure 14). When Cdc5  
409 expression was induced at 6 h, JMs almost immediately began to disappear and there was  
410 an increase in the levels of COs (18% compared to 12% in the absence of CuSO<sub>4</sub>). This was  
411 consistent with the role of Cdc5 in JM resolution to COs. However, when Cdc5 was induced  
412 in the *ecm11Δ* and *gmc2Δ* mutants, which delayed JM progression, the JMs immediately  
413 resolved with a rapid increase in COs (Supplementary Figure 14). In contrast to that in the  
414 WT cells, forced Cdc5 expression did not increase the final level of COs in the mutants.  
415 These results suggested that in the absence of the EG complex, Cdc5 did not activate a  
416 canonical meiotic resolution of JMs to form COs. In the other words, the EG complex is  
417 critical for the biased resolution of JMs toward their progression to COs.

418

### 419 **DISCUSSION**

420 The EG complex is a component of the SC central region and plays a role in its initiation and  
421 elongation. In the current study, we characterized *ecm11Δ* and *gmc2Δ* mutants, whose  
422 phenotypes provided new insights regarding the control of DSB formation along with ZMM-



423 dependent and ZMM-independent recombination through homolog engagement.

424

#### 425 **EG complex promotes the ZMM-dependent CO pathway**

426 In normal meiosis, CO-designated DSBs are separated from NCO-fated DSBs during early  
427 meiosis prophase I (Börner et al., 2004; Kim et al., 2010). CO-designated DSBs are  
428 processed into JMs such as SEIs and dHJs. The dHJs are subsequently subjected to biased  
429 resolution into CO products. These JM-processing reactions are highly regulated in a  
430 meiosis-specific program and are coupled to morphological changes of chromosome  
431 structures, DSB-SEI, and SEI-dHJ transitions toward the resolution into COs, which are in  
432 turn roughly correlated with changes in SC morphology such as leptotene-zygotene,  
433 zygotene-early pachytene transition, and exit from the mid-pachytene, respectively (Börner  
434 et al., 2004; Hunter, 2006). Meiosis-specific ZMM proteins play a major role in JM processing  
435 into COs. In addition, there are mitotic processing pathways of JMs in meiotic cells, which  
436 are resolved into either COs or NCOs or are resolved into NCO (dissolution) (Dayani et al.,  
437 2011; De Muyt et al., 2012). A previous study further suggested that the “mitotic-like” Sgs1-  
438 dependent resolution of JMs is suppressed by ZMM proteins (De Muyt et al., 2012; Tang et  
439 al., 2016).

440 In the current study, physical analyses demonstrated that *ecm11Δ* and *gmc2Δ* mutants  
441 exhibited delayed JM processing such as in the SEI-dHJ transition and JM resolution.  
442 Interestingly, the DSB-SEI transition in these mutants appeared to be normal. This indicated  
443 that the EG complex was not required for early ZMM-dependent JM processing, but was  
444 needed for late processing, which might correlate with the establishment and maintenance of  
445 ZMM-dependent JM processing in meiosis (Figure 7). Consistent with that the *ecm11Δ* and  
446 *gmc2Δ* mutants showing normal establishment of the ZMM-pathway, cytological analysis in  
447 the present study showed normal Zip3 and Msh5 distributions on chromosomes in the  
448 *ecm11Δ* and *gmc2Δ* mutants. Conversely, ZMMs are required for the loading and  
449 polymerization of the EG complex together with the transverse filament protein Zip1. Taken

450 together, the EG complex appears to be a positive modulator of late ZMM functions,  
451 particularly for the maintenance of ZMM-dependent recombination but not for its  
452 establishment. This is supported by the fact that *ecm11Δ* and *gmc2Δ* mutants did not affect  
453 NCOs, whose frequencies are indirectly affected by “early” ZMM functions (Börner et al.,  
454 2004).

455

#### 456 **EG complex suppresses the ZMM-independent CO pathway**

457 In the absence of the EG complex in a WT background, even with delayed processing of  
458 JMs, about two thirds of the JMs were resolved during late meiosis at approximately 7–8 h  
459 (Figure 2B). However, COs were gradually formed in the mutants. This suggested that a  
460 portion of the CO-designated JMs were not resolved into COs but rather into NCOs. This  
461 was consistent with the concept that the EG complex is required for the maintenance of  
462 ZMM functions. This resolution in the mutants may be independent of ZMM functions (Figure  
463 7). In the absence of the EG complex, ZMM-independent processing of JMs seemed to  
464 operate for JM resolution, which could be catalyzed by mitotic resolvases. Indeed, we found  
465 that the *ecm11Δ* and *gmc2Δ* mutations suppressed a defect in JM processing in the *zip3Δ*  
466 and *zip1Δ* mutants. The *ecm11Δ zip3Δ* and *gmc2Δ zip3Δ* mutants formed more COs than the  
467 *zip3Δ* single mutant, but the amounts of COs in the double mutants were similar to those in  
468 the *ecm11Δ* and *gmc2Δ* single mutants. Given that the *ecm11Δ zip3Δ* and *gmc2Δ zip3Δ*  
469 mutants showed lower steady-state levels of JMs than the *ecm11Δ* and *gmc2Δ* mutants,  
470 most COs in the double mutants might not form through JM intermediates. This suggests  
471 that JM-processing activities of the probable “mitotic” resolvases seem to be more active in  
472 the absence of the EG complex than in its presence. In other words, the EG complex might  
473 limit the activity of “mitotic-like” JM processing enzymes not only in the absence of ZMM  
474 proteins but also in their presence.

475

476 **EG complex suppresses DSB formation in late prophase I**

477 Genetic analysis showed increased CO and NCO frequencies on chromosome VII in the  
478 *gmc2Δ* mutant, which was consistent with previous genetic analyses of chromosome VIII  
479 (Voelkel-Meiman et al., 2016). This was further supported by physical analysis at the *ERG1*  
480 locus on chromosome VII as both CO and NCO levels were increased in the *ecm11Δ* and  
481 *gmc2Δ* mutants. These recombination increases may be simply be explained as being due  
482 to increased events of recombination initiation. Conversely, genetic analysis of markers on  
483 chromosome III showed decreased or WT-like levels of COs and slightly increased levels of  
484 NCO in the mutants. At the *HIS4LEU2* locus, reduced CO and normal NCO levels were  
485 observed in the *ecm11Δ* and *gmc2Δ* mutants. Furthermore, the formation of NCOs in the  
486 mutants was temporally separated from that of COs. Importantly, the levels of JMs at the  
487 locus in *ecm11Δ* and *gmc2Δ* mutants in an *ndt80Δ* background were the same as those in  
488 the parental *ndt80Δ* cells. Given that the mutants were defective in processing CO-  
489 designated DSBs, it was likely that at least “early” DSB levels on chromosome III in the  
490 mutants were the same or slightly increased relative to those in the WT strain. Indeed, when  
491 DSB levels were measured in repair-deficient mutants, such as *rad50S* and *dmc1Δ*, at least  
492 five loci on different chromosomes showed similar levels of DSBs between the WT, *ecm11Δ*,  
493 and *gmc2Δ* strains. This strongly suggested that the frequencies of early forming DSBs were  
494 not affected by absence of the EG complex. When the Spo11-oligo complex, which is a  
495 byproduct of DSB formation by Spo11 and whose amount is proportional to DSB  
496 frequencies, was analyzed in *ndt80Δ* and *gmc2Δ ndt80Δ* with a pachytene arrest, early  
497 amounts of Spo11-oligos and their kinetics were similar between the *ndt80Δ* and *gmc2Δ*  
498 *ndt80Δ* mutants. In contrast, the steady-state amount of Spo11-oligo at late meiotic prophase  
499 I increased more in the *gmc2Δ ndt80Δ* mutant than in *ndt80Δ*. This indicated that during late  
500 prophase I, more DSBs were formed in cells defective in the central region of the SC.

501 Previous studies have shown that more Spo11-oligos are observed in mutants

502 defective in synapsis (e.g., *zmm* mutants), suggesting that homolog engagement  
503 suppresses DSB formation as a negative feedback control (Thacker et al., 2014; Kauppi et  
504 al., 2013). Our analysis of the *ecm11Δ* and *gmc2Δ* mutants supports this idea. In addition,  
505 our findings clearly indicated that ZMM assembly on meiotic chromosomes was not involved  
506 in this DSB suppression, as the *ecm11Δ* and *gmc2Δ* mutants showed normal Zip3/Msh5 foci  
507 formation. This indicated that SC elongation suppressed additional DSB formation in late  
508 prophase I as a feedback mechanism. In addition to the suppression by homolog  
509 engagement, DSB formation is negatively regulated by Ndt80 and recombination checkpoint  
510 kinases such as Tel1/ATM (Thacker et al., 2014; Zhang et al., 2011). Delayed JM processing  
511 in the *ecm11Δ* and *gmc2Δ* mutants may induce recombination checkpoints to downregulate  
512 Ndt80-dependent pachytene exit. As the Spo11-oligos levels were increased more in the  
513 *gmc2Δ ndt80Δ* mutant than in the *ndt80Δ* mutant, EG complex-dependent suppression of  
514 late DSBs apparently works independently of Ndt80. Activation of Tel1/ATM-dependent  
515 feedback control may explain the increased levels of DSBs in the *ecm11Δ* and *gmc2Δ*  
516 mutants. However, this is less likely as the levels of Spo11-oligos did not increase in the  
517 mutants during early meiosis when Tel1/ATM was activated. Moreover, in the background of  
518 the *rad50S* mutation, which robustly activates Tel1 kinase activity, we failed to observe any  
519 increase in DSB levels in the *ecm11Δ* and *gmc2Δ* mutants.

520       During late prophase I, SC elongation facilitates axis remodeling. The axis proteins  
521 Hop1 and Red1 are required for efficient DSB formation and are abundantly localized on  
522 chromosomes in a *zmm* mutant (Smith and Roeder, 1997). Furthermore, increased DSB  
523 levels were observed in the *ndt80Δ* mutant, which forms a full-length SC with Hop1/Red1  
524 (Figure 5F) (Joshi et al., 2009). One possibility is that persistent Hop1/Red1 localization on  
525 chromosomes in the *ecm11Δ* and *gmc2Δ* mutants may induce additional DSBs. Therefore,  
526 EG complex-dependent suppression of DSB formation is likely to function through the  
527 removal of Hop1/Red1. In addition, the meiotic DSB-forming machinery might be functionally

528 suppressed in the context of a full-length SC and the presence of the central regions.

529

### 530 **Role of SC central region in CO control**

531 Synapsis-dependent suppression of DSB formation may explain increased recombination  
532 levels on long chromosomes. We speculated that the late-forming DSBs in unsynaptic  
533 chromosomes may be processed through a ZMM-independent recombination pathway that  
534 produces non-interfering COs and NCOs. The *ecm11Δ* and *gmc2Δ* mutants showed reduced  
535 CO interference relative to that of the WT in the genetic assays. In contrast, these mutants  
536 appeared to produce WT-like levels of Zip3 foci on chromosomes. Compromised CO  
537 interference in the mutants may be simply explained by the formation of additional non-  
538 interfering COs with adequate levels of interfering COs.

539       The fact that the *ecm11Δ* and *gmc2Δ* mutants retained significant CO interference with  
540 the normal number of Zip3 foci suggests that the establishment of CO interference is  
541 implemented in the absence of the central region of SC, and therefore in the absence of SC  
542 elongation or polymerization. Thus, SC polymerization and/or SC itself is not necessary for  
543 CO interference. This is consistent with the results presented by Kleckner and colleagues  
544 ([Zhang et al. 2014a](#); [Zhang et al. 2014b](#)).

545

### 546 **Conclusion**

547 Meiotic prophase I processes represent a unique meiotic event of the SC that mediates  
548 homologous chromosome pairing, homolog engagement, and crossing over via  
549 recombination ([Börner et al., 2004](#); [Storlazzi et al., 2010](#); [Voelkel-Meiman et al. 2015](#)). Little  
550 is currently known regarding the role of assembly of the SC central region in meiotic  
551 recombination. In this study, by analyzing the role of the EG complex in SC central region  
552 assembly, we determined that the EG complex-mediated SC central region was involved in  
553 multiple events pertaining to the control of recombination reactions, which ensured meiosis-  
554 specific properties such as regulated formation of interfering COs. The roles of the EG

555 complex in controlling recombination include ZMM-dependent JM processing, JM resolution,  
556 and suppression of the ZMM-independent processing of JMs, as well as the downregulation  
557 of meiotic DSB formation during late prophase I (Figure 7). We propose that a compartment  
558 of the SC central region, which shows liquid-crystal properties and mediates phase  
559 separation (Rog et al., 2017), may function to sequester ZMM-dependent and ZMM-  
560 independent recombination proteins in the region, as well as to shuttle the DSB-forming  
561 machinery out of the region and that this is fostered by the EG complex and transverse  
562 filament Zip1.

563

## 564 **Experimental Procedures**

### 565 **Yeast strains**

566 All strains used in this study are derivatives of SK1. Strain genotypes are listed in  
567 Supplementary Table 1.

568

### 569 **Meiotic time courses**

570 Meiotic time courses were studied as described previously (Hong et al., 2013; Oh et al.,  
571 2009; Kim et al., 2010; Yoon et al., 2016; Hong et al., 2019b). Strains maintained on YPG  
572 plates (1% yeast extract, 2% bactopectone, 2% bactoagar, 3% glycerol) were streaked onto  
573 YPD plates (1% yeast extract, 2% bactopectone, 2% bactoagar, 2% glucose) and grown for  
574 two days. A single colony was resuspended in 2 ml liquid YPD medium (1% yeast extract,  
575 2% bactopectone, 2% glucose) and grown to saturation. To induce synchronous meiosis,  
576 cells were inoculated into SPS medium (1% potassium acetate, 1% bactopectone, 0.5%  
577 yeast extract, 0.17% yeast nitrogen base with ammonium sulfate and without amino acids,  
578 0.5% ammonium sulfate, 0.05 M potassium biphthalate, pH 5.5) and incubated for 18 h. The  
579 cultures were then washed with pre-warmed SPM medium and resuspended in SPM  
580 medium (1% potassium acetate, 0.02% raffinose). Cells were harvested at indicated time  
581 points for each time course experiment. For the low-temperature time course experiments,

582 synchronized cells were transferred to SPM medium and then the temperature was shifted to  
583 23°C.

584

### 585 **Physical analysis**

586 Genomic DNA was extracted from cultured cells using a guanidine-phenol extraction method  
587 as described previously (Kim et al., 2010; Hong et al., 2013; Yoon et al., 2016; Hong et al.,  
588 2019b). For physical analysis of JMs, cell cultures were harvested and cross-linked with  
589 psoralen under ultraviolet light. Genomic DNA (2 µg) was digested with 60 units *Xho*I  
590 restriction enzyme and electrophoresis was performed using a 0.6% agarose gel for 1D gel  
591 analysis. For native/native 2D gel analysis, 2.5 µg of *Xho*I-digested DNA samples was  
592 loaded onto 0.4% agarose gels, electrophoresed, and the gel lanes containing the DNA of  
593 interest were cut. The gel strips were then placed on 2D gel trays and 0.8% agarose  
594 containing ethidium bromide was poured into the trays. Two-dimensional gel electrophoresis  
595 was performed in Tris-borate-EDTA buffer containing ethidium bromide at approximately 6  
596 V/cm for 6 h at 4°C. The gels were transferred to Biodyne B membranes (Pall) for Southern  
597 hybridization. The probes were radiolabeled with  $\alpha$ -<sup>32</sup>P-dCTP using a random priming kit.  
598 Hybridizing DNA species were visualized using a phosphorimager (Bio-Rad) and quantified  
599 with QuantityOne software (Bio-Rad). For detection of the *HIS4LEU2* locus by Southern  
600 blotting, probes were amplified from yeast genomic DNA using primers 5'-  
601 ATATACCGGTGTTGGGCCTTT-3' and 5'-ATATAGATCTCCTACAATATCAT-3'; primer  
602 sequences of DNA probes for the *ERG1* (*Sac*II, *Sac*II + *Sal*I) locus were 5'-  
603 ATGGAAGATATAGAAGGATACGAACC-3' and 5'-GCGACGCAAATTCGCCGATGGTTTG-3';  
604 and primer sequences of DNA probes for the *ERG1* (*Hind*III) locus were 5'-  
605 GGCAGCAACATATCTCAAGGCC-3' and 5'-TCAATGTAGCCTGAGATTGTGGCG-3'.

606

### 607 **Spore viability and genetic distance**

608 Spore viability and genetic distances between markers and CO interference were analyzed

609 as previously described (Shinohara et al., 2008; Shinohara, 2019). Parental haploid strains  
610 (MSY4245 and MSY4304 derivatives) were mated for 3 h on YPAD plates and then  
611 transferred onto SPM plates. To exclude tetrads with mitotic COs, four independent crosses  
612 were analyzed. Map distances were calculated using the Perkins equation:  $cM = 100 (TT +$   
613  $6NPD)/2(PD + TT + NPD)$ . Standard errors were calculated using the Stahl Lab online tool  
614 (<https://elizabethhousworth.com/StahlLabOnlineTools>).

615

### 616 **Chromosome spreading and immunofluorescence**

617 Immunostaining of yeast meiotic chromosome spreads was performed as described  
618 previously (Shinohara et al., 2000). Stained samples were observed using an  
619 epifluorescence microscope (Zeiss Axioskop 2) and a 100× objective (Zeiss AxioPlan,  
620 NA1.4). Images were captured using a CCD camera (Retiga; Qimaging) and processed  
621 using iVision (BioVision Technologies) and Photoshop (Adobe) software. Antibodies against  
622 Zip3 (rabbit and rat) (Shinohara et al, 2008), Rad51 (guinea pig) (Shinohara et al, 2000),  
623 Dmc1 (rabbit) (Hayase, 2004), Msh5 (rabbit) (Shinohara et al, 2008), and Red1 (chicken)  
624 (Shinohara et al, 2008) were generated using recombinant proteins purified from *Escherichia*  
625 *coli*.

626

### 627 **Spo11-oligo assay**

628 Spo11-oligo detection was performed according to previously described methods (Neale and  
629 Keeney, 2009) with modifications. Spo11-oligo complexes were immunoprecipitated from 20  
630 ml of synchronous meiotic yeast culture treated with 10% TCA. After preparation of the cell  
631 extract using glass beads (Yasui Kikai Co Ltd.), Spo11-FLAG was immunoprecipitated using  
632 anti-DYKDDDDK tag antibody (1E6, FUJIFILM Wako) and protein G-conjugated magnetic  
633 beads (Dynabeads, Veritas) in IP buffer (2% Triton X-100, 30 mM Tris-HCl [pH 8.0], 300 mM  
634 NaCl, 2 mM EDTA, 0.02% SDS). Immunoprecipitates were washed with IP buffer twice, and  
635 then a 10% volume of each sample was analyzed by western blotting and Spo11-FLAG



636 protein levels in the precipitates were measured using an Odyssey infrared imaging system  
637 (LI-COR Biosciences). The remaining 90% of the samples were used for end-labeling  
638 reactions. For end-labeling of Spo11-oligo, immunoprecipitates were washed twice with  
639 NEBuffer #4 (New England Bio Labs). The beads were then suspended in TdT reaction  
640 buffer (1× NEBuffer #4, 0.25 mM CoCl<sub>2</sub>, 15 U TdT (Takara Bio), 20 Ci α-<sup>32</sup>P-dCTP [6000  
641 Ci/mmol]), and incubated at 37°C for 2 h. Radio-labeled Spo11-oligos were separated by  
642 SDS-PAGE after washing with IP buffer three times, visualized using a Phosphor imager  
643 BAS5000 (FUJIFILM), and quantified using ImageQuant software (GE Healthcare).

644

#### 645 **Acknowledgements**

646 We are particularly thankful to Nancy Kleckner and Neil Hunter for providing the yeast  
647 strains. This work was supported by grants to K.P.K from the National Research Foundation  
648 of Korea funded by the Ministry of Science, ICT & Future Planning (No.  
649 2020R1A2C2011887; 2018R1A5A1025077) and the Next-Generation BioGreen 21 Program  
650 (SSAC, No. PJ01322801), Rural Development Administration, Republic of Korea, and to  
651 M.S. from the Japan Society for the Promotion of Science (JSPS) KAKENHI (No. 19K22402  
652 and 15H05973) and the Hyogo Science and Technology Association.

653

#### 654 **Figure Legends**

##### 655 **Figure 1. Ecm11–Gmc2 complex regulates meiotic recombination in a bivalent-** 656 **dependent manner**

657 (A) Schematic representation of the location of marker genes of chromosomes III and VII in  
658 the MSY4304/4245 diploid and of chromosomes VII and V in the S2921/MSY5085 diploid.

659 (B) Map distances within each indicated genetic interval of chromosomes III, VII, and V in  
660 WT (black) and *gmc2Δ* (blue) strains analyzed using Perkins formula. Error bars show the  
661 standard error (S.E.).

662 (C) CO frequencies (cM) per physical length (kb) of each genetic interval of chromosomes  
663 III, VII, and V in WT and *gmc2Δ* strains.

664 (D) Frequencies of non-Mendelian segregation of indicated genetic loci in tetrads of WT and  
665 *gmc2Δ* strains.

666

667 **Figure 2. Physical analysis of meiotic recombination in *ecm11Δ* and *gmc2Δ* mutants**

668 (A) Physical map of the *HIS4LEU2* locus of chromosome III showing the *XhoI* (X) restriction  
669 endonuclease site and position of the probes for Southern hybridization. Maternal and  
670 paternal fragments were distinguished by *XhoI* polymorphisms. For analysis of CO and  
671 NCO, DNA was digested with both *XhoI* and *NgoMIV* endonucleases. Mom, maternal  
672 species (5.9 kb); Dad, paternal species (4.3 kb); COs, crossovers (5.6 and 4.6 kb); DSBs,  
673 double-strand breaks (<3.3 and <3 kb); CO, crossover (4.6 kb); NCO, non-crossover (4.3  
674 kb).

675 (B) One-dimensional (1D) gel analysis of DSBs, COs, and NCOs in WT, *ecm11Δ*, *gmc2Δ*,  
676 and *ecm11Δ gmc2Δ* strains. Gel analysis (1D) showing Mom, Dad, DSBs, and CO species  
677 (top). CO and NCO of recombinants are displayed in the CO/NCO gel analysis (bottom).

678 (C) Quantitation of DSBs and COs shown in panel B.

679 (D) Quantitative analysis of CO (black line) and NCO (gray dashed line).

680 (E) Quantitative analysis of CO and NCO from three independent meiotic time-course  
681 experiments (mean  $\pm$  SD;  $N = 3$ ). Significant differences were analyzed using unpaired *t*-  
682 tests (\*\*  $p < 0.01$ ; ns, not significant).

683 (F) Quantitative analysis of DSBs at various loci in *rad50S*, *rad50S ecm11Δ*, *rad50S gmc2Δ*,  
684 and *rad50S ecm11Δ gmc2Δ* strains. Data indicate mean  $\pm$  SD ( $N = 3$ ). See Supplementary  
685 Figure 4 for more detail.

686

687 **Figure 3. Two-dimensional (2D) gel analysis for *ecm11Δ*, *gmc2Δ*, and *ecm11Δ gmc2Δ* in**

688 **WT and *ndt80Δ* backgrounds**

689 (A) Physical map of the *HIS4LEU2* locus. IH-dHJ, interhomolog double-Holliday junction; IS-  
690 dHJ, intersister double-Holliday junction; SEIs, single-end invasions.

691 (B) Representative images of 2D analysis of WT, *ecm11Δ*, *gmc2Δ*, and *ecm11Δ gmc2Δ*  
692 strains (top). Quantitation of SEIs and dHJs (bottom).

693 (C) Representative 2D analysis images of the *HIS4LEU2* locus in *ndt80Δ*, *ndt80Δ ecm11Δ*,  
694 *ndt80Δ gmc2Δ*, and *ndt80Δ ecm11Δ gmc2Δ* strains.

695 (D) Quantitative analysis of dHJs and SEIs in an *ndt80Δ* background at the *HIS4LEU2* locus.  
696 Data indicate mean  $\pm$  SD ( $N = 3$ ). Significant differences were analyzed using unpaired  $t$ -  
697 tests (ns, not significant).

698

699 **Figure 4. Meiotic recombination analysis at the *ERG1* locus in *ecm11Δ*, *gmc2Δ*, and**  
700 ***ecm11Δ gmc2Δ* mutants**

701 (A) Schematic diagram of the *ERG1* locus showing restriction enzyme sites and position of  
702 the probe. Parental chromosomes, Mom and Dad, are distinguished by restriction enzyme  
703 site polymorphisms (S = *Sac*II).

704 (B) Representative image of 1D gel analysis at the *ERG1* locus in WT, *ecm11Δ*, *gmc2Δ*, and  
705 *ecm11Δ gmc2Δ* strains. Quantitative analysis of the 1D gel at the *ERG1* locus in WT,  
706 *ecm11Δ*, *gmc2Δ*, and *ecm11Δ gmc2Δ* strains. CO levels are shown for maximum levels.  
707 Three independent meiotic cultures were used for calculation of the standard deviation  
708 (mean  $\pm$  SD;  $N = 3$ ). Significant differences were analyzed using unpaired  $t$ -tests (\*\*  $p <$   
709 0.01).

710 (C) Comparison of CO levels at the *HIS4LEU2* and *ERG1* loci. Each colored circle indicates  
711 the ratio of COs for *HIS4LEU2* versus *ERG1*. Data indicate mean  $\pm$  SD ( $N = 3$ ).

712 (D) Representative image of CO and NCO analysis of WT, *ecm11Δ*, *gmc2Δ*, and  
713 *ecm11Δ gmc2Δ* strains. For CO and NCO gel analysis, the DNA samples were digested with

714 *SacII* and *SaI*.

715 (E) Quantitative analysis of CO and NCO. Data indicate mean  $\pm$  SD ( $N = 3$ ). Significant  
716 differences were analyzed using unpaired  $t$ -tests ( $*p < 0.05$ ,  $**p < 0.01$ ).

717 (F) Physical map of the *ERG1* locus for 2D gel analysis.

718 (G) Representative 2D gel analysis image of the *ERG1* locus.

719 (H) Quantitative analysis of dHJs. Data indicate mean  $\pm$  SD ( $N = 3$ ). Significant differences  
720 were analyzed using unpaired  $t$ -tests ( $*p < 0.05$ ).

721 (I) Gel analysis (2D) of the *ERG1* locus in *ndt80 $\Delta$* , *ndt80 $\Delta$  ecm11 $\Delta$* , *ndt80 $\Delta$  gmc2 $\Delta$* , and  
722 *ndt80 $\Delta$  ecm11 $\Delta$  gmc2 $\Delta$*  strains. The DNA samples were digested with *HindIII* restriction  
723 enzyme and used for 2D analysis to detect JMs at the *ERG1* locus. JMs in the *ERG1* locus  
724 were detected by Southern blotting using an *ERG1* probe (Lao et al., 2013).

725 (J) Quantification of SEIs and dHJs at the *ERG1* locus. Data indicate mean  $\pm$  SD ( $N = 3$ ).  
726 Significant differences were analyzed by unpaired  $t$ -tests ( $*p < 0.05$ ).

727

## 728 **Figure 5. DSB formation and Zip3 distribution in WT and *gmc2 $\Delta$* cells**

729 (A) Representative image of  $^{32}$ P-labeled DNA fragments covalently bound to Spo11-3FLAG  
730 in immunoprecipitates from WT, *ndt80 $\Delta$* , and *ndt80 $\Delta$  gmc2 $\Delta$*  cells at the indicated times.

731 (B) Relative DNA fragment signals at each time point. Relative amounts of Spo11-oligo  
732 complex were calculated as described in Experimental Procedures. Data indicate mean  $\pm$   
733 SD ( $N = 3$ ).

734 (C) Average number of Rad51 foci per nucleus at the indicated time points analyzed for the  
735 *ndt80 $\Delta$*  and *ndt80 $\Delta$  gmc2 $\Delta$*  mutants. The number of nuclei counted at each time point is  
736 shown at the top.

737 (D) Average number of Zip3 foci per nucleus in the *ndt80 $\Delta$*  and *ndt80 $\Delta$  gmc2 $\Delta$*  mutants. The  
738 number of nuclei counted at each timepoint is shown at the top.

739 (E) Average number of Msh5 foci per nucleus in the *ndt80 $\Delta$*  and *ndt80 $\Delta$  gmc2 $\Delta$*  mutants. The

740 number of nuclei counted at each time point is shown at the top.

741 (F) Representative image of meiotic nuclear spread from *ndt80Δ* cells at 8 hr post meiosis

742 entry. The cells were co-stained for anti-Red1 (red) and anti-Zip3 (green). A schematic

743 explanation of the classification of each category of bivalent length is shown.

744 (G) Comparison of distribution of bivalent length between *ndt80Δ* and *ndt80Δ*

745 *gmc2Δ* mutants.

746 (H) Distribution of distances between adjacent Zip3 foci on short, medium, and long

747 bivalents. Data indicate mean  $\pm$  SD for more than three independent trials. The

748 Mann-Whitney *U*-test was applied for statistical analysis and the results shown in panels G

749 and H.

750 (I) Correlations between the total numbers of Zip3 foci on each bivalent and the length of

751 bivalent in WT and *gmc2Δ* strains. *P*-value was analyzed using Wald-Wolfowitz runs test.

752

### 753 **Figure 6. Ecm11 and Gmc2 inhibit additional DSB formation in *zip3Δ* cells**

754 (A) Representative Southern blot image of 1D gel analysis in *zip3Δ*, *zip3Δ ecm11Δ*, *zip3Δ*

755 *gmc2Δ*, and *zip3Δ ecm11Δ gmc2Δ* mutants assessed at 0, 2.5, 3.5, 4, 5, 6, 7, 8, 10, and 24

756 h.

757 (B) Quantification of DSBs and total Cos, and analysis of meiotic division.

758 (C) Two-dimensional gel detection of DSB formation at 4 h and 24 h in *zip3Δ*, *zip3Δ ecm11Δ*,

759 *zip3Δ gmc2Δ*, and *zip3Δ ecm11Δ gmc2Δ* mutants. Dashed squares indicate DSB regions.

760 (D) Representative image of 2D gel analysis in *zip3Δ*, *zip3Δ ecm11Δ*, *zip3Δ gmc2Δ*, and

761 *zip3Δ ecm11Δ gmc2Δ* mutants.

762 (E) Quantification of SEIs and dHJs from panel D.

763

### 764 **Figure 7. Roles of the EG complex in a feedback mechanism linked to DSB number**

765 **and ZMM-dependent crossover formation**

766 (A) Proposed mechanism of chromosome synapsis-dependent feedback as defined by  
767 *ecm11* and *gmc2* mutant phenotypes. EG complex facilitates the chromosomal assembly of  
768 Zip1 ([Voelkel-Meiman et al., 2013](#)) and modulates the meiotic recombination frequency and  
769 distribution through chromosome synapsis-dependent feedback. The arrest of JM resolution  
770 in the absence of the EG complex may be readily explained by a pathway in which unstable  
771 SC structures cause defection of CO-fated recombination. The EG complex-mediated SC  
772 central region provides an environment for proper recombination processing through phase  
773 separation.

774 (B) Model for EG complex-mediated feedback controls of DSB formation, ZMM-dependent  
775 recombination, and ZMM-independent recombination.

776

## 777 **References**

- 778 1. Agarwal, S., and Roeder, G.S. (2000) Zip3 provides a link between recombination  
779 enzymes and synaptonemal complex proteins. *Cell*, **102**, 245-255.
- 780 2. Allers, T., and Lichten, M. (2001) Differential timing and control of noncrossover and  
781 crossover recombination during meiosis. *Cell*, **13**, 47-57.
- 782 3. Anderson, C.M., Oke, A., Yam, P., Zhuge, T., and Fung, J.C. (2015) Reduced  
783 Crossover Interference and Increased ZMM-Independent Recombination in the  
784 Absence of Tel1/ATM. *PLoS Genet.*, **11**, e1005478.
- 785 4. Börner, G.V., Kleckner, N. and Hunter, N. (2004) Crossover/noncrossover  
786 differentiation, synaptonemal complex formation, and regulatory surveillance at the  
787 leptotene/zygotene transition of meiosis. *Cell*, **117**, 29-45.
- 788 5. Cannavo, E., Cejka, P., and Kowalczykowski, S.C. (2013) Relationship of DNA  
789 degradation by *Saccharomyces cerevisiae* exonuclease 1 and its stimulation by RPA  
790 and Mre11-Rad50-Xrs2 to DNA end resection. *Proc. Natl. Acad. Sci. USA*, **110**,  
791 e1661-1668.

- 792 6. Cheng, C.H., Lo, Y.H., Liang, S.S., Ti, S.C., Lin, F.M., Yeh, C.H., Huang, H.Y., and  
793 Wang, T.F. (2006) SUMO modifications control assembly of synaptonemal complex  
794 and polycomplex in meiosis of *Saccharomyces cerevisiae*. *Genes Dev.* **20**, 2067–  
795 2081.
- 796 7. Chua, P.R., and Roeder, G.S. (1998) Zip2, a meiosis-specific protein required for the  
797 initiation of chromosome synapsis. *Cell*, **93**, 349-359.
- 798 8. Cloud, V., Chan, Y.L., Grubb, J., Budke, B., and Bishop, D.K. (2012) Rad51 is an  
799 accessory factor for Dmc1-mediated joint molecule formation during meiosis.  
800 *Science*, **337**, 1222-1225.
- 801 9. Dayani, Y., Simchen, G., and Lichten, M. (2011) Meiotic recombination intermediates  
802 are resolved with minimal crossover formation during return-to-growth, an analogue  
803 of the mitotic cell cycle. *PLoS Genet* **5**, e1002083
- 804 10. De Muyt, A., Jessop, L., Kolar, E., Sourirajan, A., Chen, J., Dayani, Y., Lichten, M.  
805 (2012) BLM helicase ortholog Sgs1 is a central regulator of meiotic recombination  
806 intermediate metabolism. *Mol. Cell*, **46**, 43–53
- 807 11. Garcia, V., Phelps, S.E., Gray, S., and Neale, M.J. (2011) Bidirectional resection of  
808 DNA double-strand breaks by Mre11 and Exo1. *Nature*, **479**, 241-244.
- 809 12. Hayase, A., Takagi, M., Miyazaki, T., Oshiumi, H., Shinohara, M., and Shinohara, A.  
810 (2004) A protein complex containing Mei5 and Sae3 promotes the assembly of the  
811 meiosis-specific RecA homolog Dmc1. *Cell*, **119**, 927-940.
- 812 13. Higashide, M., and Shinohara M. (2016) Budding yeast SLX4 contributes to the  
813 appropriate distribution of crossovers and meiotic double-strand break formation on  
814 bivalents during meiosis. *G3 Bethesda* **6**, 2033–204
- 815 14. Hong, S., Joo, J.H., Yun, H., and Kim, K. (2019a) The nature of meiotic chromosome  
816 dynamics and recombination in budding yeast. *J. Microbiol.*, **57**, 221-231.
- 817 15. Hong, S., Joo, J.H., Yun, H., Kleckner, N., and Kim, K.P. (2019b) Recruitment of

- 818 Rec8, Pds5 and Rad61/Wapl to meiotic homolog pairing, recombination, axis  
819 formation and S-phase. *Nucleic Acids Res.*, **47**, 11691-11708.
- 820 16. Hong, S., Sung, Y., Yu, M., Lee, M., Kleckner, N., and Kim, K.P. (2013) The logic and  
821 mechanism of homologous recombination partner choice. *Mol. Cell*, **51**, 440-453.
- 822 17. Hooker, G.W., and Roeder, G.S. (2006) A role for SUMO in meiotic chromosome  
823 synapsis. *Curr. Biol.*, **16**, 1238-1243.
- 824 18. Humphryes, N., Leung, W.K., Argunhan, B., Terentyev, Y., Dvorackova, M., and  
825 Tsubouchi, H. (2013) The Ecm11-Gmc2 complex promotes synaptonemal complex  
826 formation through assembly of transverse filaments in budding yeast. *PLoS Genet.*,  
827 **9**, e1003194.
- 828 19. Hunter, N. (2006) Meiotic recombination. In: Aguilera, A.; Rothstein, R., editors.  
829 Molecular Genetics of Recombination. *Heidelberg: Topics in Current Genetics*,  
830 *Springer-Verlag*, P381-442.
- 831 20. Hunter, N. (2015) Meiotic Recombination: The Essence of Heredity. *Cold Spring*  
832 *Harb Perspect Biol.*, **7**, a016618.
- 833 21. Joshi, N., Barot, A., Jamison, C., and Börner, G.V (2009) Pch2 links chromosome  
834 Axis remodeling at future crossover sites and crossover distribution during yeast  
835 meiosis. *PLoS Genet.*, **5**, e1000557.
- 836 22. Kauppi, L., Barchi, M., Lange, J., Baudat, F., Jasin, M., and Keeney, S. (2013)  
837 Numerical constraints and feedback control of double-strand breaks in mouse  
838 meiosis. *Genes Dev.*, **27**, 873-886.
- 839 23. Keeney, S., Lange, J., and Mohibullah, N. (2014) Self-organization of meiotic  
840 recombination initiation: general principles and molecular pathways. *Annu. Rev.*  
841 *Genet.*, **48**, 187-214.
- 842 24. Kim, K.P., Weiner, B.M., Zhang, L., Jordan, A., Dekker, J., and Kleckner, N. (2010)  
843 Sister cohesion and structural axis components mediate homolog bias of meiotic  
844 recombination. *Cell*, **143**, 924-937.



- 845 25. Lam, I., and Keeney, S. (2014) Mechanism and regulation of meiotic recombination  
846 initiation. *Cold Spring Harb Perspect Biol.*, **7**, a016634.
- 847 26. Lao, J.P., Cloud, V., Huang, C.C., Grubb, J., Thacker, D., Lee, C.Y., Dresser, M.E.,  
848 Hunter, N., and Bishop, D.K. (2013) Meiotic crossover control by concerted action of  
849 Rad51-Dmc1 in homolog template bias and robust homeostatic regulation. *PLoS*  
850 *Genet.*, **9**, e1003978.
- 851 27. Liu, Y., Gaines, W.A., Callender, T., Busygina, V., Oke, A., Sung, P., Fung, J.C., and  
852 Hollingsworth, N.M. (2014) Down-regulation of Rad51 activity during meiosis in  
853 yeast prevents competition with Dmc1 for repair of double-strand breaks. *PLoS*  
854 *Genet.*, **10**, e1004005.
- 855 28. Lynn, A., Soucek, R., and Börner, G.V. (2007) ZMM proteins during meiosis:  
856 crossover artists at work. *Chromosome Res.*, **15**, 591-605.
- 857 29. Mimitou, E.P., Yamada, S., and Keeney, S. (2017) A global view of meiotic double-  
858 strand break end resection. *Science*, **355**, 40-45.
- 859 30. Mu, X., Murakami, H., Mohibullah, N., and Keeney, S. (2020) Chromosome-  
860 autonomous feedback downregulates meiotic DSB competence upon synaptonemal  
861 complex formation. bioRxiv. doi: <https://doi.org/10.1101/2020.05.11.089367>.
- 862 31. Neale, M.J., and Keeney, S. (2009) End-labeling and analysis of Spo11-  
863 oligonucleotide complexes in *Saccharomyces cerevisiae*. *Methods Mol. Biol.*, **557**,  
864 183-195.
- 865 32. Oh, S.D., Jessop, L., Lao, J.P., Allers, T., Lichten, M., and Hunter, N. (2009)  
866 Stabilization and electrophoretic analysis of meiotic recombination intermediates in  
867 *Saccharomyces cerevisiae*. *Methods Mol. Biol.*, **557**, 209-234.
- 868 33. Page, S.L., and Hawley, R.S. (2004) The genetics and molecular biology of the  
869 synaptonemal complex. *Annu. Rev. Cell Dev. Biol.*, **20**, 525-558.
- 870 34. Pyatnitskaya, A., Borde, V., and De Muyt, A. (2019) Crossing and zipping: molecular  
871 duties of the ZMM proteins in meiosis. *Chromosoma*, **128**, 181-198.

- 872 35. Robert, T., Nore, A., Brun, C., Maffre, C., Crimi, B., Bourbon, H.M., and de Massy, B.  
873 (2016) The TopoVIB-Like protein family is required for meiotic DNA double-strand  
874 break formation. *Science*, **26**, 943-949.
- 875 36. Rockmill, B., Fung, J.C., Branda, S.S., and Roeder, G.S. (2003) The Sgs1 helicase  
876 regulates chromosome synapsis and meiotic crossing over. *Curr. Biol.* **13**, 1954-  
877 1962.
- 878 37. Rog, O., Köhler, S., and Dernburg, A. (2017) The synaptonemal complex has liquid  
879 crystalline properties and spatially regulates meiotic recombination factors. *eLife*, **6**,  
880 e21455
- 881 38. Serrentino, M.E., Chaplais, E., Sommermeyer, V., and Borde, V. (2013) Differential  
882 association of the conserved SUMO ligase Zip3 with meiotic double-strand break  
883 sites reveals regional variations in the outcome of meiotic recombination. *PLoS*  
884 *Genet.*, **9**, e1003416.
- 885 39. Shinohara, M., Bishop, D.K., and Shinohara, A. (2019) Distinct Functions in  
886 Regulation of Meiotic Crossovers for DNA Damage Response Clamp Loader  
887 Rad24(Rad17) and Mec1(ATR) Kinase. *Genetics*, **213**, 1255-1269.
- 888 40. Shinohara, M., Gasior, S.L., Bishop, D.K., and Shinohara, A. (2000) Tid1/Rdh54  
889 promotes colocalization of rad51 and dmc1 during meiotic recombination. *Proc. Natl.*  
890 *Acad. Sci. USA*, **97**, 10814-10819.
- 891 41. Shinohara, M., Oh, S.D., Hunter, N., and Shinohara, A. (2008) Crossover assurance  
892 and crossover interference are distinctly regulated by the ZMM proteins during yeast  
893 meiosis. *Nat. Genetics*, **40**, 299-309.
- 894 42. Smith, A.V., and Roeder, G.S. (1997) The yeast Red1 protein localizes to the cores  
895 of meiotic chromosomes. *J Cell Biol.* **136**, 957-967.
- 896 43. Sourirajan, A., and Lichten, M. (2008) Polo-like kinase Cdc5 drives exit from  
897 pachytene during budding yeast meiosis. *Genes Dev.*, **22**, 2627-2632.
- 898 44. Storlazzi, A., Gargano, S., Ruprich-Robert, G., Falgue, M., David, M., Kleckner, N.,

- 899 and Zickler, D. (2010) Recombination proteins mediate meiotic spatial chromosome  
900 organization and pairing. *Cell*, **141**, 94-106.
- 901 45. Tang, S., Wu, M.K., Zhang, R., and Hunter, N. (2015). Pervasive and essential roles  
902 of the Top3-Rmi1 decatenase orchestrate recombination and facilitate chromosome  
903 segregation in meiosis. *Mol Cell*, **57**, 607–621
- 904 46. Thacker, D., Mohibullah, N., Zhu, X., and Keeney, S. (2014) Homologue  
905 engagement controls meiotic DNA break number and distribution. *Nature*, **510**, 241-  
906 246.
- 907 47. Tsubouchi, T., Zhao, H., and Roeder, G.S. (2006) The meiosis-specific Zip4 protein  
908 regulates crossover distribution by promoting synaptonemal complex formation  
909 together with Zip2. *Dev. Cell*, **10**, 809-819.
- 910 48. Voelkel-Meiman, K., Cheng, S.Y., Morehouse, S.J., and MacQueen, A.J. (2016)  
911 Synaptonemal complex proteins of budding yeast define reciprocal roles in MutSy-  
912 mediated crossover formation. *Genetics*, **203**, 1091-1103.
- 913 49. Voelkel-Meiman, K., Johnston, C., Thappeta, Y., Subramanian, V.V., Hochwagen, A.,  
914 and MacQueen, A.J. (2015) Separable Crossover-Promoting and Crossover-  
915 Constraining Aspects of Zip1 Activity during Budding Yeast Meiosis. *PLoS Genet.*,  
916 **11**, e1005335.
- 917 50. Voelkel-Meiman, K., Taylor, L.F., Mukherjee, P., Humphryes, N., Tsubouchi, H., and  
918 Macqueen, A.J. (2013) SUMO localizes to the central element of synaptonemal  
919 complex and is required for the full synapsis of meiotic chromosomes in budding  
920 yeast. *PLoS Genet.*, **9**, e1003837.
- 921 51. Watts, F.Z., and Hoffmann, E. (2011) SUMO meets meiosis: an encounter at the  
922 synaptonemal complex: SUMO chains and sumoylated proteins suggest that  
923 heterogeneous and complex interactions lie at the centre of the synaptonemal  
924 complex. *Bioessays*, **33**, 529-537.
- 925 52. Yoon, S.W., Lee, M.S., Xaver, M., Zhang, L., Hong, S.G., Kong, Y.J., Cho, H.R.,

- 926 Kleckner, N., and Kim, K.P. (2016) Meiotic prophase roles of Rec8 in crossover  
927 recombination and chromosome structure. *Nucleic Acids Res.*, **44**, 9296-9314.
- 928 53. Zhang, L., Kim, K.P., Kleckner, N.E., and Storlazzi, A. (2011) Meiotic double-strand  
929 breaks occur once per pair of (sister) chromatids and, via Mec1/ATR and Tel1/ATM,  
930 once per quartet of chromatids. *Proc. Natl. Acad. Sci. USA*, **13**, 20036-20041.
- 931 54. Zhang, L., Wang, S., Yin, S., Hong, S., Kim, K.P., and Kleckner, N. (2014a)  
932 Topoisomerase II mediates meiotic crossover interference. *Nature*, **511**, 551-556.
- 933 55. Zhang, L., Liang, Z., Hutchinson, J., and Kleckner, N. (2014b) Crossover patterning  
934 by the beam-film model: analysis and implications. *PLoS Genetics*, **10**, e1004042.
- 935 56. Zickler, D., and Kleckner, N. (2015) Recombination, pairing, and synapsis of  
936 homologs during meiosis. *Cold Spring Harb Perspect Biol.*, **7**, a016626.

937

938

### 939 **Supplementary Information**

#### 940 **Supplementary Figure S1. CO interference analysis of WT and *gmc2Δ* strains**

941 (A) CO interference in NPD ratio in chromosomes III, VII and V.

942 (B) Coefficient of coincidence in chromosomes III and VII.

943

#### 944 **Supplementary Figure S2. Spore viability test for WT, *ecm11Δ*, *gmc2Δ* and**

#### 945 ***ecm11Δ gmc2Δ* strains**

946 (A) Meiotic nuclear division for WT, *ecm11Δ*, *gmc2Δ* and *ecm11Δ gmc2Δ* strains.

947 (B) Spore viability analysis for WT, *ecm11Δ*, *gmc2Δ* and *ecm11Δ gmc2Δ* strains.

948

#### 949 **Supplementary Figure S3. Gel analysis (2D) of CO and NCO for *ecm11Δ* and *gmc2Δ***

#### 950 **mutants**

951 (A) Representative image of two-dimensional (2D) gel analysis of CO and NCO. Genomic

952 DNA was digested with *XhoI* restriction enzyme for first dimension gel analysis and digested  
953 *in situ* with *BamHI* for second dimension gel analysis.

954 (B) Quantitative analysis of the 2D gel of CO and NCO in WT, *ecm11Δ*, *gmc2Δ* and *ecm11Δ*  
955 *gmc2Δ* strains.

956

#### 957 **Supplementary Figure S4. Analysis of DSB levels in *rad50s* backgrounds**

958 (A) Images (1D) of the *HIS4LEU2* locus in *rad50S*, *rad50S ecm11Δ*, *rad50S gmc2Δ* and  
959 *rad50S ecm11Δ gmc2Δ* cells (left). Quantification of DSBs from three independent meiotic  
960 cultures (right).

961 (B) Gel analysis (1D) at different loci in *rad50S*, *rad50S/ecm11Δ*, *rad50S gmc2Δ* and *rad50S*  
962 *ecm11Δ gmc2Δ* strains. *ARG4*, *BUD23*, *CYS3*, and *ERG1* loci located on chromosomes VIII,  
963 III, I and VII, respectively.

964 (C) Quantitative analysis of DSBs at various loci in three and two (*ERG1*) sets of  
965 independent meiotic cultures.

966

#### 967 **Supplementary Figure S5. Analysis of DSB levels in *dmc1Δ* backgrounds**

968 (A) Gel analysis (1D) at the *HIS4LEU2*, *ARG4*, *BUD23*, and *CYS3* loci in *dmc1Δ*, *dmc1Δ*  
969 *ecm11Δ*, *dmc1Δ gmc2Δ* and *dmc1Δ ecm11Δ gmc2Δ* mutants.

970 (B) Quantification of DSBs.

971

#### 972 **Supplementary Figure S6. Gel analysis (2D) for WT, *ecm11Δ*, *gmc2Δ*, and *ecm11Δ*** 973 ***gmc2Δ* strains at the *HIS4LEU2* hotspot**

974 (A) Gel images (2D) of Southern blotting for WT, *ecm11Δ*, *gmc2Δ* and *ecm11Δ gmc2Δ*  
975 strains at the *HIS4LEU2* locus. Images show DNA species from representative meiotic time  
976 courses. (B) Representative images and quantitative analysis of WT, *ecm11Δ*, *gmc2Δ* and  
977 *ecm11Δ gmc2Δ* strains at the *HIS4LEU2* locus.

978

979 **Supplementary Figure S7. Gel analysis (2D) for WT, *ecm11Δ*, *gmc2Δ* and *ecm11Δ***  
980 ***gmc2Δ* strains at the *ERG1* locus**

981 (A) Gel images (2D) of Southern blotting for WT, *ecm11Δ*, *gmc2Δ* and *ecm11Δ gmc2Δ*  
982 strains at the *ERG1* locus. Images show DNA species from representative meiotic time  
983 courses.

984 (B) Representative images and quantitative analysis of WT, *ecm11Δ*, *gmc2Δ* and *ecm11Δ*  
985 *gmc2Δ* strains at the *ERG1* locus.

986

987 **Supplementary Figure S8. Analysis of DSB levels in WT, *ecm11Δ*, *gmc2Δ* and *ecm11Δ***  
988 ***gmc2Δ* at the *ERG1* locus**

989 (A) Representative 1D gel images of WT, *ecm11Δ*, *gmc2Δ* and *ecm11Δ gmc2Δ* at the *ERG1*  
990 locus.

991 (B) Quantitative analysis of images shown in (A). Error bars indicate mean  $\pm$  SD (N = 2).

992

993 **Supplementary Figure S9. Chromosome analysis of WT, *ecm11Δ*, *gmc2Δ* and *ecm11Δ***  
994 ***gmc2Δ* cells**

995 (A) Representative images of chromosome spreads and cells immunostained for Zip3  
996 (green) along meiotic progression of WT and *gmc2Δ* cells.

997 (B) Quantification of the number of Zip3 foci-positive nuclei along meiotic progression in WT  
998 (black), *ecm11Δ* (red), *gmc2Δ* (blue) and *ecm11Δ gmc2Δ* (green) cells.

999 (C) Quantification of the number of Zip3 foci along meiotic progression in WT and *gmc2Δ*  
1000 cells.

1001 (D) Representative images of chromosome spreads and cells immunostained for Rad51  
1002 (green) and Dmc1 (red) along meiotic progression in WT and mutant cells.

1003 (E) Quantification of the number of Rad51 and Dmc1 foci-positive nuclei along meiotic

1004 progression.

1005 (F) Quantification of the number of Rad51 and Dmc1 foci along meiotic progression.

1006

1007 **Supplementary Figure S10. EG complex prevents additional DSB formation after the**  
1008 **Ndt80 pathway, even with pseudosynapsis**

1009 (A) Representative image of meiotic nuclear spread from *ndt80Δ gmc2Δ* and *ndt80Δ gmc2Δ*  
1010 *sgs1-Δ200* cells at 8 hr post meiosis entry. Cells were co-stained for anti-Red1 (green), anti-  
1011 Zip1 (red), and DAPI (blue). Schematic presentation of chromosome structures of each  
1012 mutant.

1013 (B) Representative image of <sup>32</sup>P-labeled DNA fragments covalently bound to Spo11-3FLAG  
1014 in immunoprecipitates and quantitative analysis of the images for *ndt80Δ*, *ndt80Δ gmc2Δ*,  
1015 *ndt80Δ sgs1-Δ200* and *ndt80Δ gmc2Δ sgs1-Δ200* mutants. Error bars indicate mean ± SD (*N*  
1016 = 4).

1017

1018 **Supplementary Figure S11. Absence of EG complex restrains zip3Δ-induced**  
1019 **additional DSBs at various loci**

1020 (A, B, and C) Southern blot analysis (1D) of *ARG4*, *CYS3*, and *ERG1* loci in *zip3Δ*, *zip3Δ*  
1021 *ecm11Δ*, *zip3Δ gmc2Δ* and *zip3Δ ecm11Δ gmc2Δ* mutants.

1022 (D) Quantitative analysis of DSB shown in panels A, B and C.

1023

1024 **Supplementary Figure S12. Absence of EG complex restrains zip1Δ-induced**  
1025 **additional DSBs at various loci**

1026 (A, B, and C) Southern blot analysis of *ARG4*, *CYS3*, and *ERG1* loci in *zip1Δ*, *zip1Δ*  
1027 *ecm11Δ*, *zip1Δ gmc2Δ* and *zip1Δ ecm11Δ gmc2Δ* mutants.

1028 (D) Quantitative analysis of DSB shown in panels A, B and C.

1029

1030 **Supplementary Figure S13. Meiotic recombination of WT, *ecm11Δ*, *gmc2Δ* and**  
 1031 ***ecm11Δ/gmc2Δ* mutants at low temperature**

1032 (A) CO/NCO analysis of WT, *ecm11Δ*, *gmc2Δ* and *ecm11Δ gmc2Δ* strains at low  
 1033 temperature.

1034 (B) Representative images of 2D gel Southern blotting time course for WT, *ecm11Δ*, *gmc2Δ*  
 1035 and *ecm11Δ gmc2Δ* strains at 23°C.

1036 (C) Quantitative analysis shown in panel B

1037

1038 **Supplementary Figure S14. Expression of Cdc5 ameliorates pachytene arrest in**  
 1039 ***ecm11Δ* or *gmc2Δ* mutants**

1040 (A) Representative images of 1D gel for *P<sub>CUP1</sub>-CDC5*, *P<sub>CUP1</sub>-CDC5 ecm11Δ* and *P<sub>CUP1</sub>-CDC5*  
 1041 *gmc2Δ* in the absence and presence of CuSO<sub>4</sub>. A total of 30 μM CuSO<sub>4</sub> was added to each  
 1042 meiotic culture at 6 hr post induction of meiosis.

1043 (B) Quantification of COs.

1044 (C) Representative image of 2D gel analysis of *P<sub>CUP1</sub>-CDC5*, *P<sub>CUP1</sub>-CDC5 ecm11Δ* and  
 1045 *P<sub>CUP1</sub>-CDC5 gmc2Δ* in the presence or absence of CuSO<sub>4</sub>.

1046 (D) Quantification of SEIs and dHJs. Arrows indicate the time for inducing Cdc5 expression.

1047

1048 Supplementary Table 1. Yeast strains used in this study.

| Strain | Genotype†                                                                                                          |
|--------|--------------------------------------------------------------------------------------------------------------------|
| KKY276 | <i>MATa/MATα HIS4::LEU2-(BamHI)/his4-x::LEU2-(NgoMIV)-URA3</i>                                                     |
| KKY730 | <i>MATa/MATα HIS4::LEU2-(BamHI)/his4-x::LEU2-(NgoMIV)-URA3, ecm11Δ::HygB<sup>r</sup></i>                           |
| KKY732 | <i>MATa/MATα HIS4::LEU2-(BamHI),his4-x::LEU2-(NgoMIV)-URA3, gmc2Δ::KanMX<sup>r</sup></i>                           |
| KKY855 | <i>MATa/MATα HIS4::LEU2-(BamHI)/his4-x::LEU2-(NgoMIV)-URA3, ecm11Δ::HygB<sup>r</sup>, gmc2Δ::KanMX<sup>r</sup></i> |
| KKY885 | <i>MATa/MATα HIS4::LEU2-(BamHI;+ori)/his4-x::LEU2-(NgoMIV)-URA3, rad50S::URA3<sup>r</sup></i>                      |
| KKY984 | <i>MATa/MATα HIS4::LEU2-(BamHI)/his4-x::LEU2-(NgoMIV)-URA3, rad50s::URA3<sup>r</sup>, ecm11Δ::HygB<sup>r</sup></i> |



|         |                                    |                                                                                                                                                          |                                                             |
|---------|------------------------------------|----------------------------------------------------------------------------------------------------------------------------------------------------------|-------------------------------------------------------------|
| KKY983  | <i>MATa/MAT<math>\alpha</math></i> | <i>HIS4::LEU2-(BamHI)/his4-x::LEU2-(NgoMIV)-URA3, gmc2<math>\Delta</math>::KanMX<sup>r</sup></i>                                                         | <i>rad50s::URA3,</i>                                        |
| KKY985  | <i>MATa/MAT<math>\alpha</math></i> | <i>HIS4::LEU2-(BamHI)/his4-x::LEU2-(NgoMIV)-URA3, ecm11<math>\Delta</math>::HygB<sup>r</sup>, gmc2<math>\Delta</math>::KanMX<sup>r</sup></i>             | <i>rad50s::URA3<sup>r</sup>,</i>                            |
| KKY389  | <i>MATa/MAT<math>\alpha</math></i> | <i>HIS4::LEU2-(BamHI)/his4-x::LEU2-(NgoMIV)-URA3, ndt80<math>\Delta</math>::KanMX4<sup>r</sup></i>                                                       |                                                             |
| KKY1469 | <i>MATa/MAT<math>\alpha</math></i> | <i>HIS4::LEU2-(BamHI)/his4-x::LEU2-(NgoMIV)-URA3, ecm11<math>\Delta</math>::HygB<sup>r</sup></i>                                                         | <i>ndt80<math>\Delta</math>::KanMX4<sup>r</sup>,</i>        |
| KKY1471 | <i>MATa/MAT<math>\alpha</math></i> | <i>HIS4::LEU2-(BamHI)/his4-x::LEU2-(NgoMIV)-URA3, gmc2<math>\Delta</math>::KanMX<sup>r</sup></i>                                                         | <i>ndt80<math>\Delta</math>::KanMX4<sup>r</sup>,</i>        |
| KKY1473 | <i>MATa/MAT<math>\alpha</math></i> | <i>HIS4::LEU2-(BamHI)/his4-x::LEU2-(NgoMIV)-URA3, ecm11<math>\Delta</math>::HygB<sup>r</sup>, gmc2<math>\Delta</math>::KanMX<sup>r</sup></i>             | <i>ndt80<math>\Delta</math>::KanMX4<sup>r</sup>,</i>        |
| KKY2945 | <i>MATa/MAT<math>\alpha</math></i> | <i>HIS4::LEU2-(BamHI)/his4-x::LEU2-(NgoMIV)-URA3, ERG1::SpeI</i>                                                                                         | <i>ERG1::Sall /</i>                                         |
| KKY3012 | <i>MATa/MAT<math>\alpha</math></i> | <i>HIS4::LEU2-(BamHI)/his4-x::LEU2-(NgoMIV)-URA3, ERG1::SpeI, ecm11<math>\Delta</math>::HygB<sup>r</sup></i>                                             | <i>ERG1::Sall /</i>                                         |
| KKY2996 | <i>MATa/MAT<math>\alpha</math></i> | <i>HIS4::LEU2-(BamHI)/his4-x::LEU2-(NgoMIV)-URA3, ERG1::Sall, gmc2<math>\Delta</math>::KanMX<sup>r</sup></i>                                             | <i>ERG1::SpeI /</i>                                         |
| KKY2997 | <i>MATa/MAT<math>\alpha</math></i> | <i>HIS4::LEU2-(BamHI)/his4-x::LEU2-(NgoMIV)-URA3, ERG1::Sall, ecm11<math>\Delta</math>::HygB<sup>r</sup>, gmc2<math>\Delta</math>::KanMX<sup>r</sup></i> | <i>ERG1::SpeI /</i>                                         |
| KKY1054 | <i>MATa/MAT<math>\alpha</math></i> | <i>HIS4::LEU2-(BamHI)/his4-x::LEU2-(NgoMIV)-URA3, zip3<math>\Delta</math>::KanMX<sup>r</sup></i>                                                         |                                                             |
| KKY1060 | <i>MATa/MAT<math>\alpha</math></i> | <i>HIS4::LEU2-(BamHI)/his4-x::LEU2-(NgoMIV)-URA3, ecm11<math>\Delta</math>::HygB<sup>r</sup></i>                                                         | <i>zip3<math>\Delta</math>::KanMX<sup>r</sup>,</i>          |
| KKY1115 | <i>MATa/MAT<math>\alpha</math></i> | <i>HIS4::LEU2-(BamHI)/his4-x::LEU2-(NgoMIV)-URA3, gmc2<math>\Delta</math>::KanMX<sup>r</sup></i>                                                         | <i>zip3<math>\Delta</math>::KanMX<sup>r</sup>,</i>          |
| KKY1059 | <i>MATa/MAT<math>\alpha</math></i> | <i>HIS4::LEU2-(BamHI)/his4-x::LEU2-(NgoMIV)-URA3, ecm11<math>\Delta</math>::HygB<sup>r</sup>, gmc2<math>\Delta</math>::KanMX<sup>r</sup></i>             | <i>zip3<math>\Delta</math>::KanMX<sup>r</sup>,</i>          |
| KKY1431 | <i>MATa/MAT<math>\alpha</math></i> | <i>HIS4::LEU2-(BamHI)/his4-x::LEU2-(NgoMIV)-URA3, dmc1<math>\Delta</math>::KanMX<sup>r</sup></i>                                                         |                                                             |
| KKY1397 | <i>MATa/MAT<math>\alpha</math></i> | <i>HIS4::LEU2-(BamHI)/his4-x::LEU2-(NgoMIV)-URA3, ecm11<math>\Delta</math>::HygB<sup>r</sup></i>                                                         | <i>dmc1<math>\Delta</math>::KanMX<sup>r</sup>,</i>          |
| KKY1400 | <i>MATa/MAT<math>\alpha</math></i> | <i>HIS4::LEU2-(BamHI)/his4-x::LEU2-(NgoMIV)-URA3, gmc2<math>\Delta</math>::KanMX<sup>r</sup></i>                                                         | <i>dmc1<math>\Delta</math>::KanMX<sup>r</sup>,</i>          |
| KKY1399 | <i>MATa/MAT<math>\alpha</math></i> | <i>HIS4::LEU2-(BamHI)/his4-x::LEU2-(NgoMIV)-URA3, ecm11<math>\Delta</math>::HygB<sup>r</sup>, gmc2<math>\Delta</math>::KanMX<sup>r</sup></i>             | <i>dmc1<math>\Delta</math>::KanMX<sup>r</sup>,</i>          |
| KKY1053 | <i>MATa/MAT<math>\alpha</math></i> | <i>HIS4::LEU2-(BamHI)/his4-x::LEU2-(NgoMIV)-URA3, zip1<math>\Delta</math>::KanMX<sup>r</sup></i>                                                         |                                                             |
| KKY1045 | <i>MATa/MAT<math>\alpha</math></i> | <i>HIS4::LEU2-(BamHI)/his4-x::LEU2-(NgoMIV)-URA3, ecm11<math>\Delta</math>::HygB<sup>r</sup></i>                                                         | <i>zip1<math>\Delta</math>::KanMX<sup>r</sup>,</i>          |
| KKY1043 | <i>MATa/MAT<math>\alpha</math></i> | <i>HIS4::LEU2-(BamHI)/his4-x::LEU2-(NgoMIV)-URA3, gmc2<math>\Delta</math>::KanMX<sup>r</sup></i>                                                         | <i>zip1<math>\Delta</math>::KanMX<sup>r</sup>,</i>          |
| KKY1135 | <i>MATa/MAT<math>\alpha</math></i> | <i>HIS4::LEU2-(BamHI)/his4-x::LEU2-(NgoMIV)-URA3, ecm11<math>\Delta</math>::HygB<sup>r</sup>, gmc2<math>\Delta</math>::KanMX<sup>r</sup></i>             | <i>zip1<math>\Delta</math>::KanMX<sup>r</sup>,</i>          |
| KKY2896 | <i>MATa/MAT<math>\alpha</math></i> | <i>HIS4::LEU2-(BamHI)/his4-x::LEU2-(NgoMIV)-URA3, KanMX6-<i>P</i><sub>CUP1</sub>-3HA-CDC5<sup>r</sup></i>                                                |                                                             |
| KKY2366 | <i>MATa/MAT<math>\alpha</math></i> | <i>HIS4::LEU2-(BamHI)/his4-x::LEU2-(NgoMIV)-URA3, ecm11<math>\Delta</math>::HygB<sup>r</sup></i>                                                         | <i>KanMX6-<i>P</i><sub>CUP1</sub>-3HA-CDC5<sup>r</sup>,</i> |
| KKY2367 | <i>MATa/MAT<math>\alpha</math></i> | <i>HIS4::LEU2-(BamHI)/his4-x::LEU2-(NgoMIV)-URA3, gmc2<math>\Delta</math>::KanMX<sup>r</sup></i>                                                         | <i>KanMX6-<i>P</i><sub>CUP1</sub>-3HA-CDC5<sup>r</sup>,</i> |

|         |                                                                                         |
|---------|-----------------------------------------------------------------------------------------|
| MSY831  | <i>MAT alpha, ho::LYS2, lys2, ura3, leu2::hisG, trp1::hisG</i>                          |
| MSY833  | <i>MAT a, ho::LYS2, lys2, ura3, leu2::hisG, trp1::hisG</i>                              |
| MHY615  | <i>MSY833/831 with SPO11-3FLAG::KanMX, ndt80Δ::LEU2</i>                                 |
| MHY645  | <i>MSY833/831 with SPO11-3FLAG::KanMX, ndt80Δ::LEU2, gmc2Δ::KanMX</i>                   |
| MSY5139 | <i>MSY833/381 with ndt80Δ::LEU2</i>                                                     |
| MHY561  | <i>MSY833/381 with ndt80Δ::LEU2, gmc2Δ::KanMX</i>                                       |
| MHY812  | <i>MSY833/831 with sgs1ΔC200::KanMX, ndt80Δ::LEU2, Spo11-3FLAG::KanMX</i>               |
| MHY824  | <i>MSY833/831 with sgs1ΔC200::KanMX, ndt80Δ::LEU2, gmc2Δ::KanMX, Spo11-3FLAG::KanMX</i> |
| MSY4988 | <i>MAT alpha ho::LYS2, lys2, HIS4-LEU2-URA3, cyh2-R, arg4-bgl</i>                       |
| MSY4304 | <i>MAT a ho::LYS2, lys2, his4B-leu2E, cup2-B, met13-B, trp5-S, ade6-B, arg4-bgl</i>     |
| MSY4992 | <i>gmc2Δ::KanMX, MSY4304</i>                                                            |
| MSY4990 | <i>gmc2Δ::KanMX, MSY4988</i>                                                            |
| MSY5085 | <i>ura3, hom3-10, trp2, cyh2-R, his1, leu2::hisG (congenic SK1)</i>                     |
| S2921   | <i>MAT a ho::LYS2, lys2, can1R, leu2::hisG (congenic SK1)</i>                           |
| MSY5209 | <i>gmc2Δ::HygB, MSY5085</i>                                                             |
| MSY5073 | <i>gmc2Δ::HygB, S2921</i>                                                               |

1049 † All strains are isogenic derivatives of parental SK1.

# Figure 1

**A**

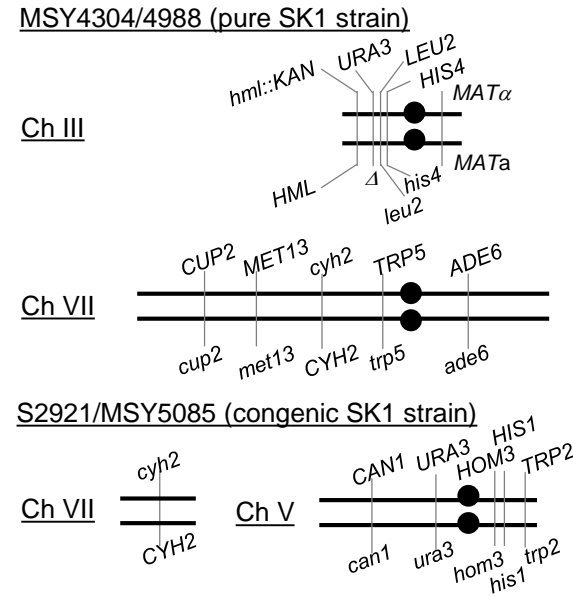

**B**

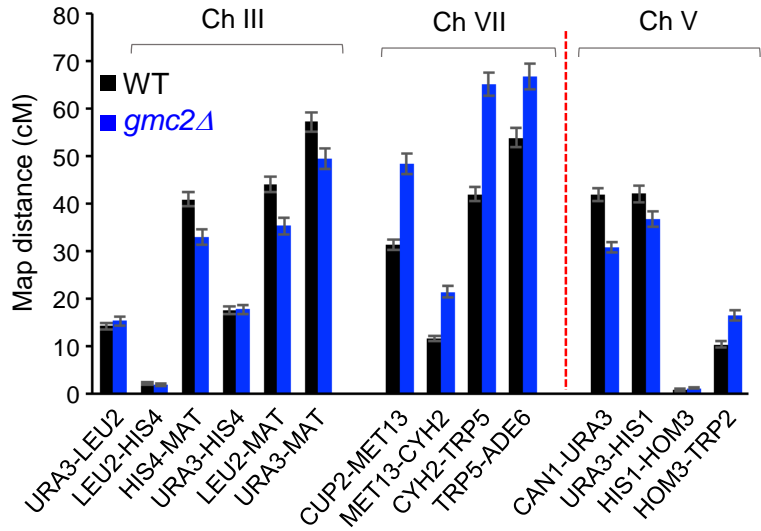

**C**

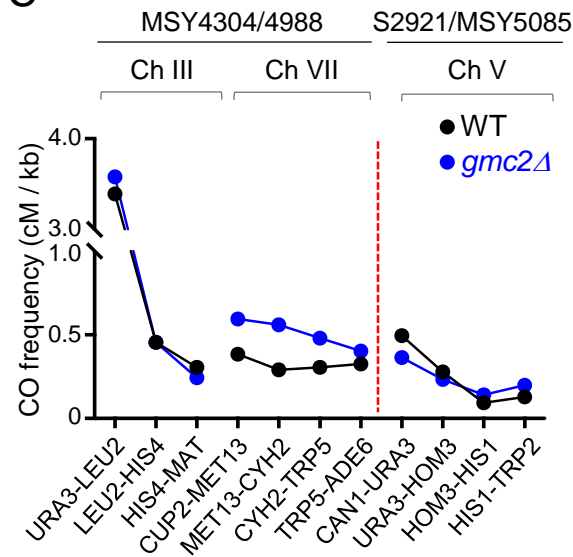

**D**

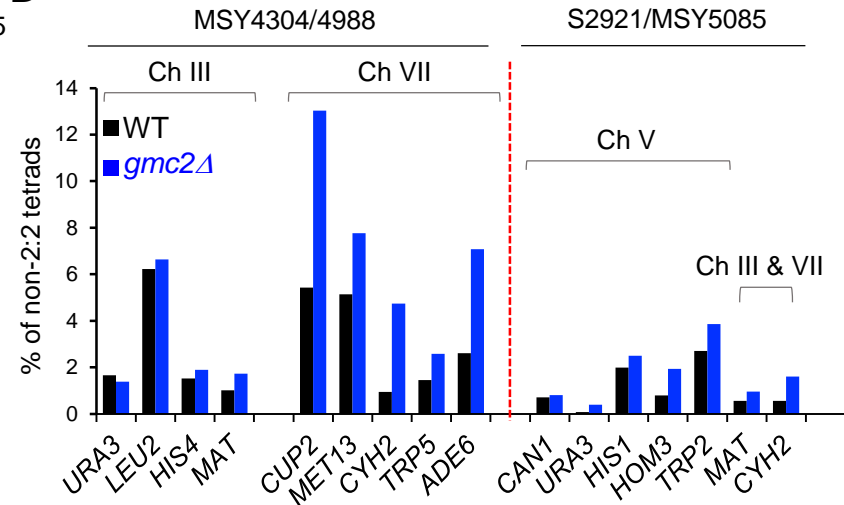

**Figure 2**

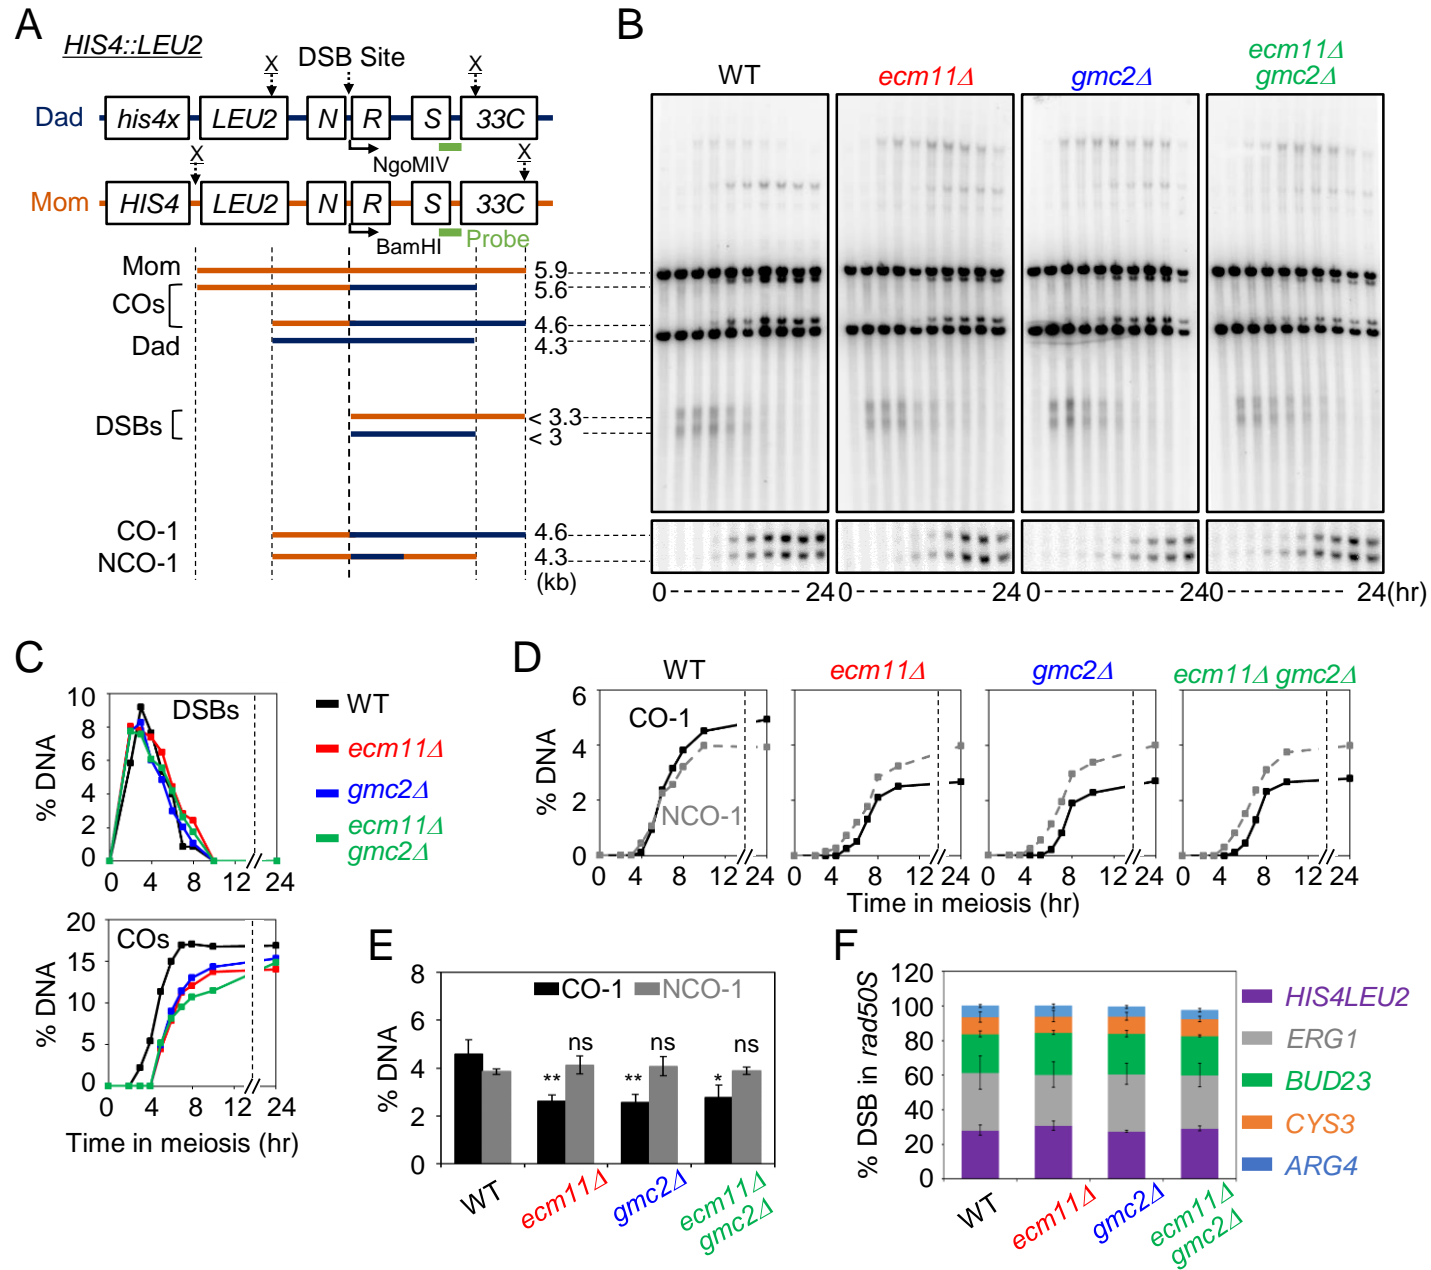

**Figure 3**

**A**

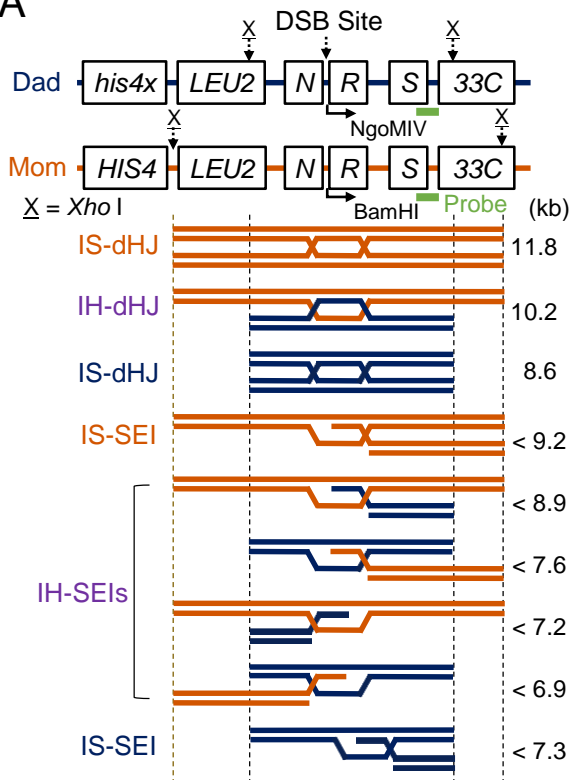

**B**

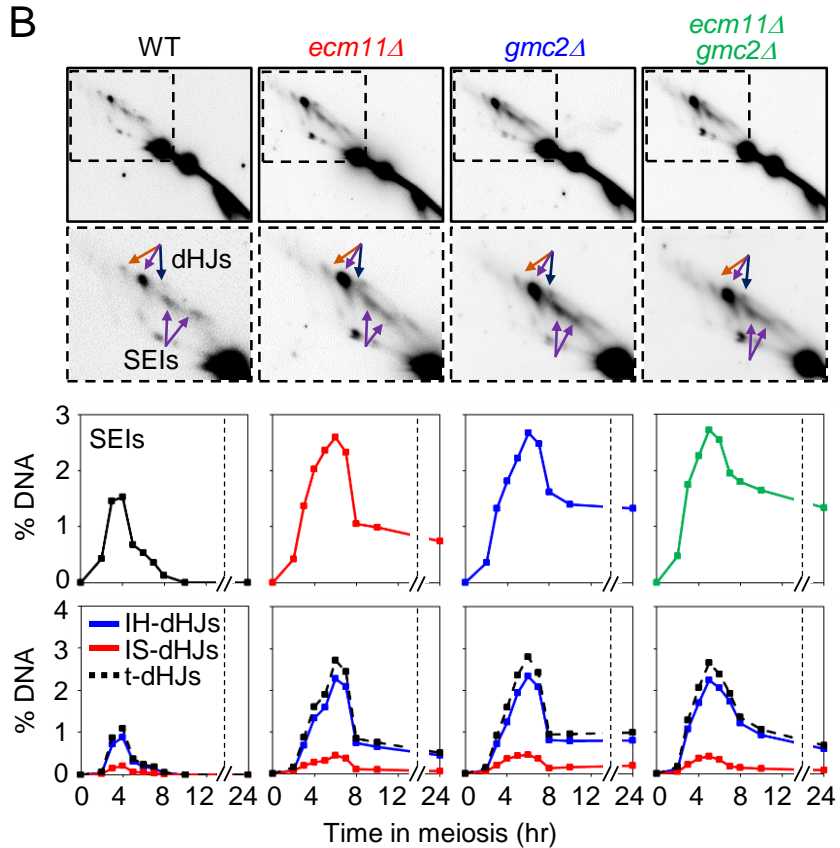

**C**

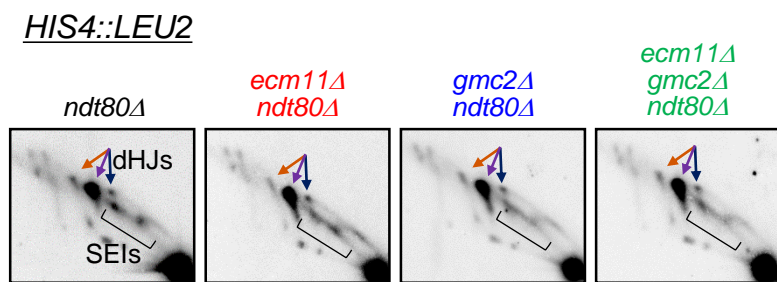

**D**

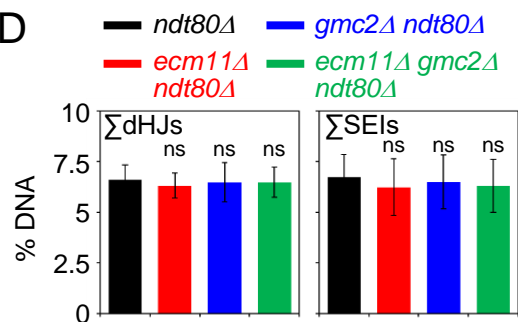

# Figure 4

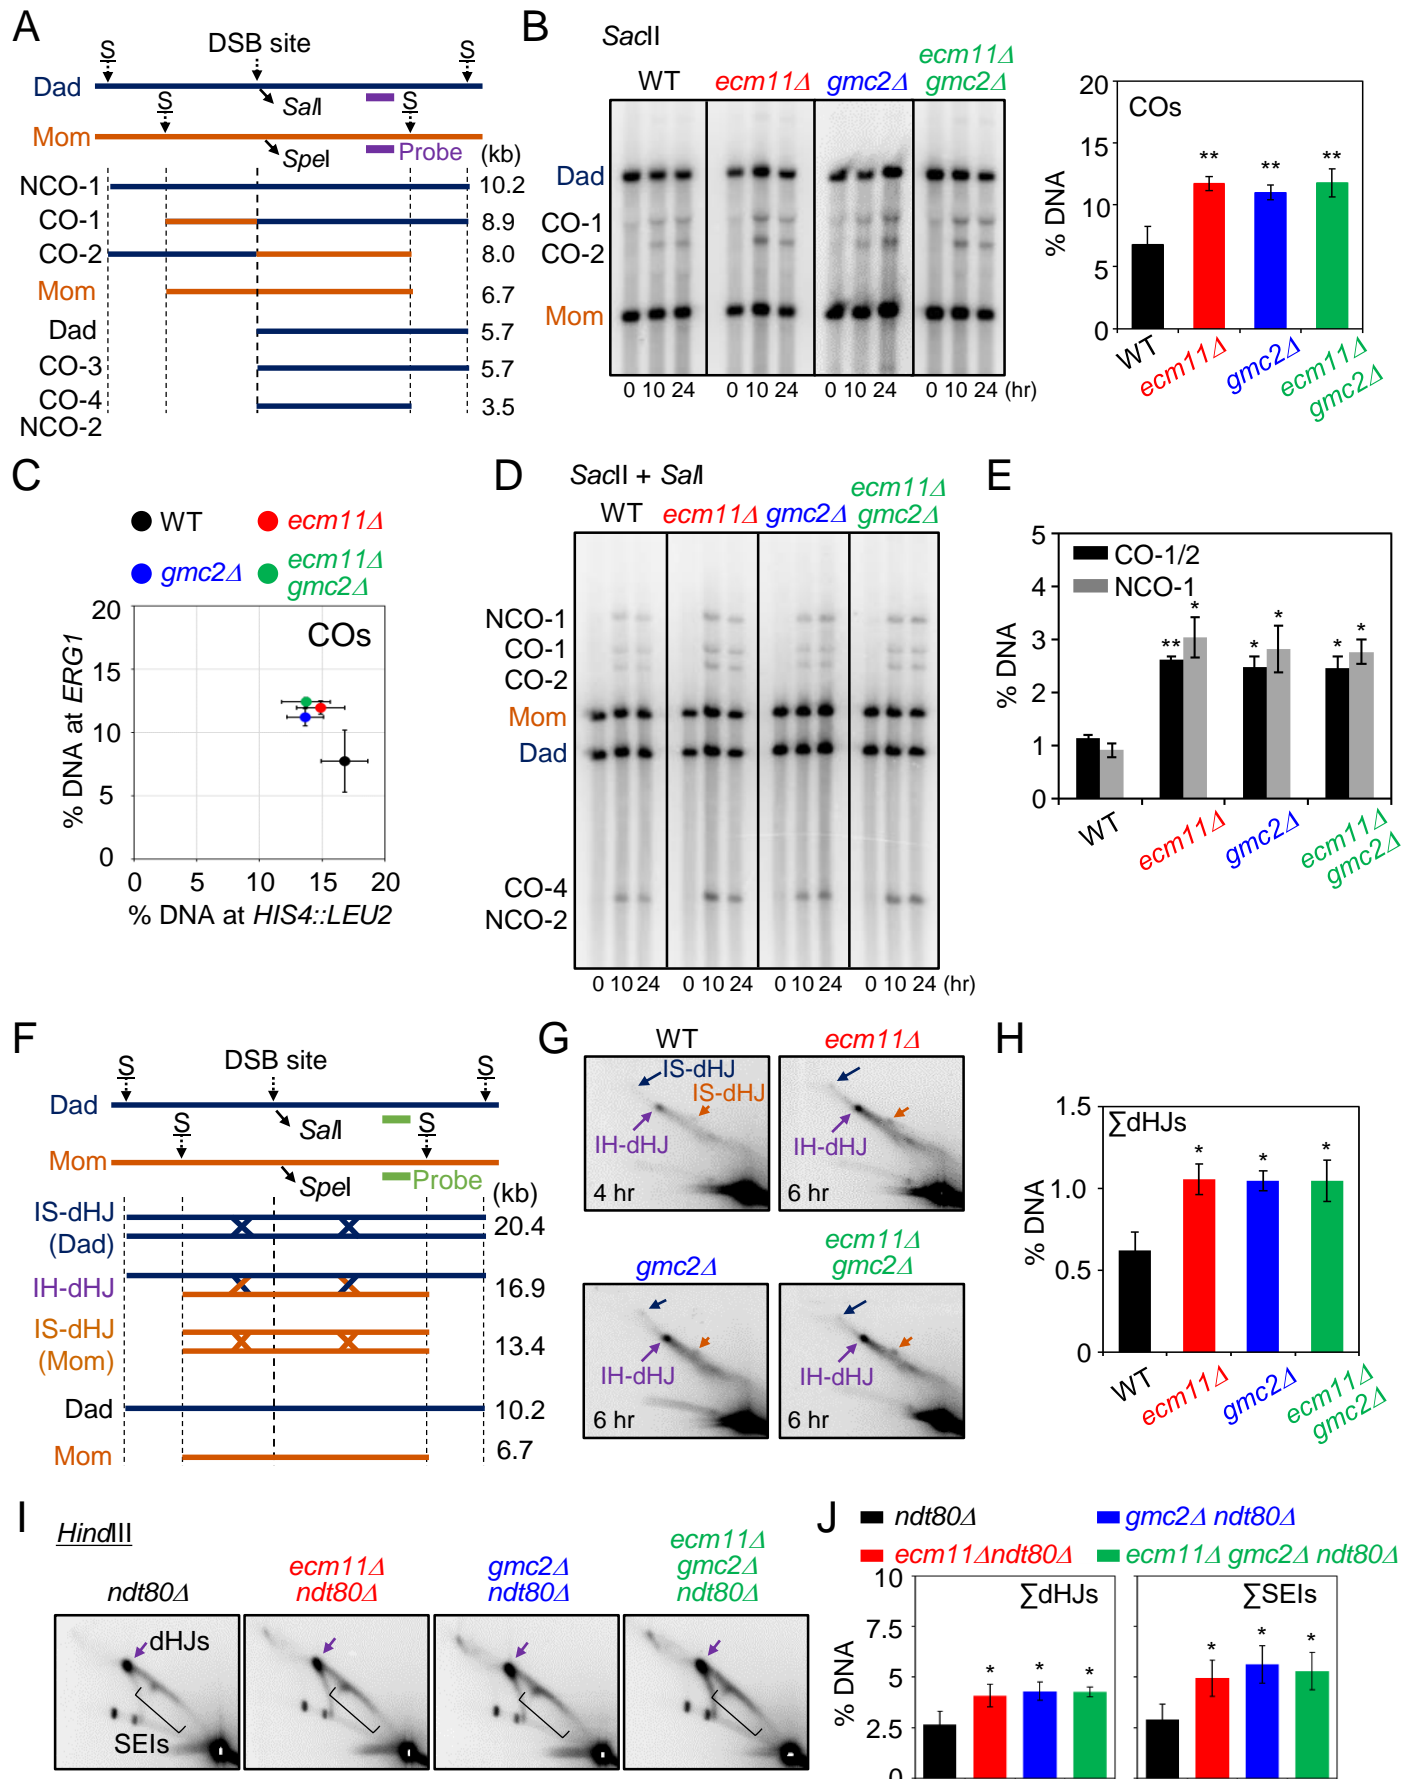

Figure 5

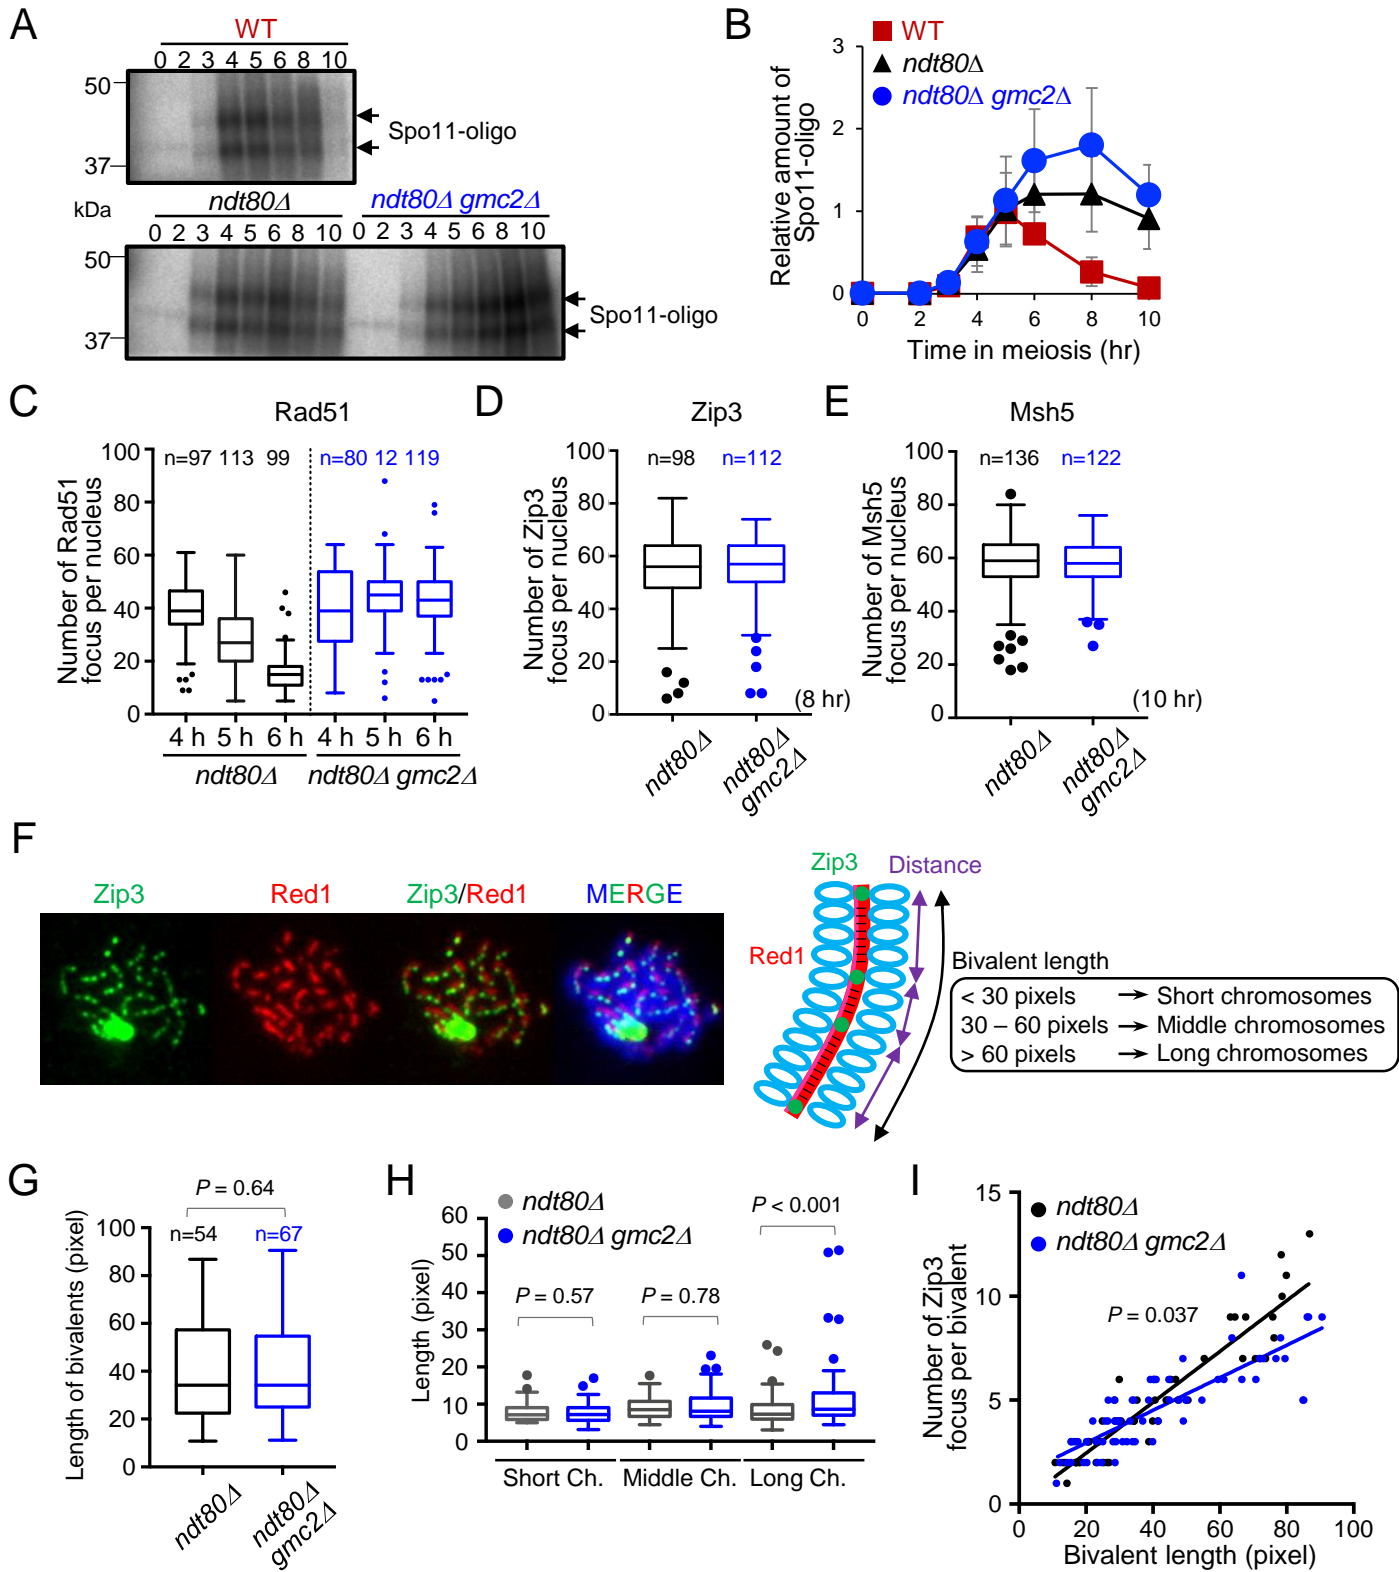

Figure 6

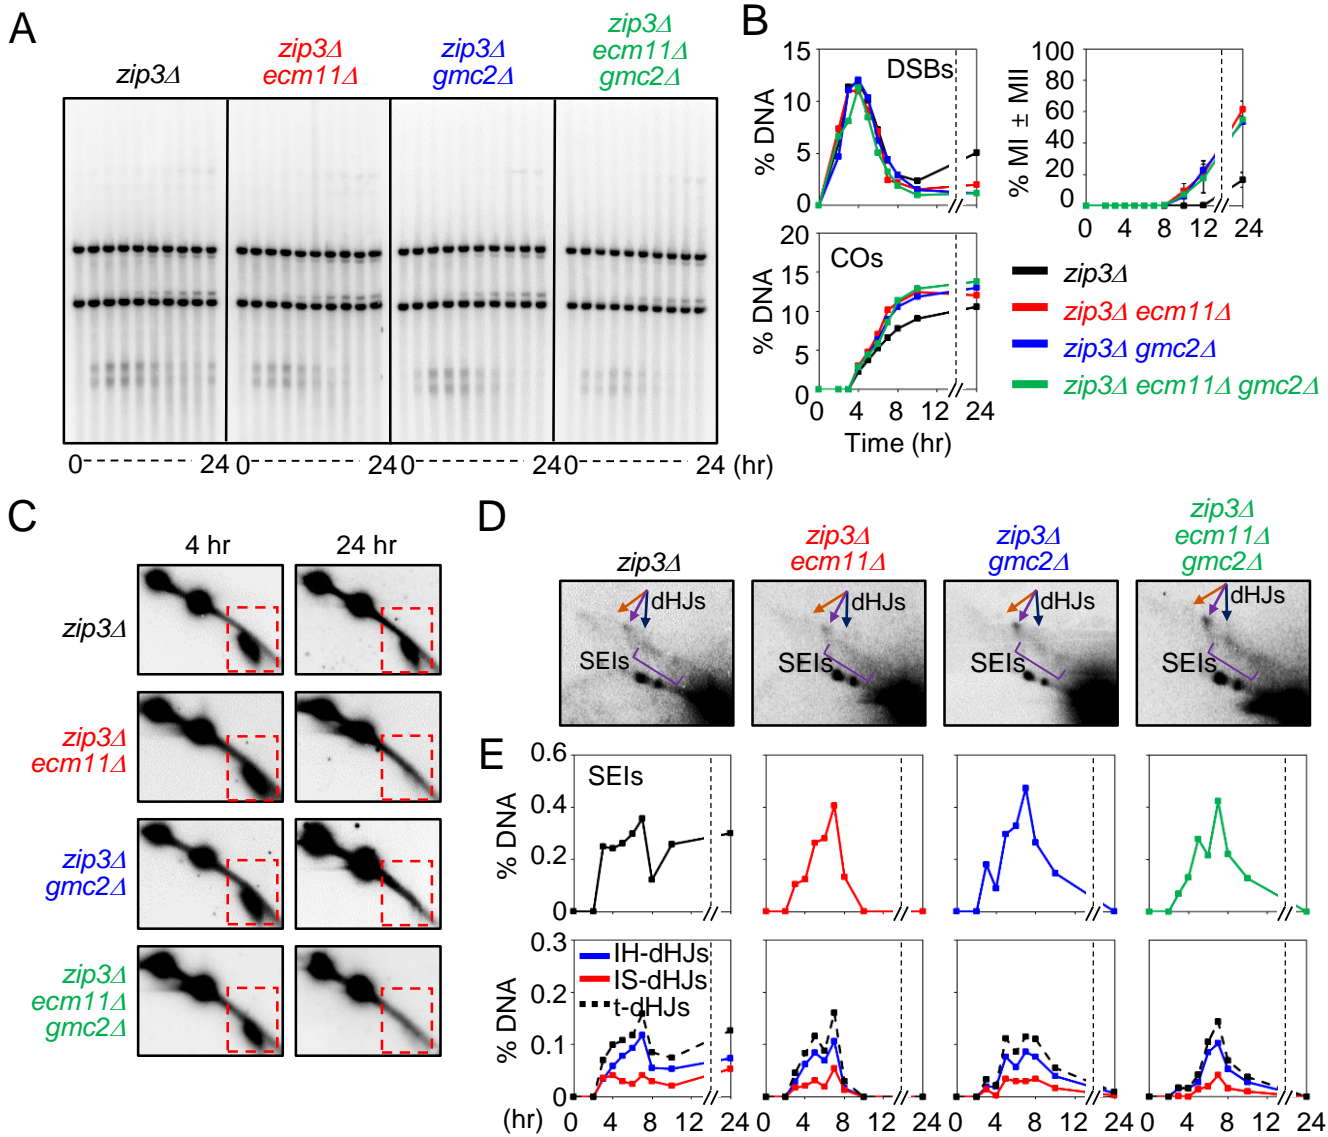



# Figure 7

A

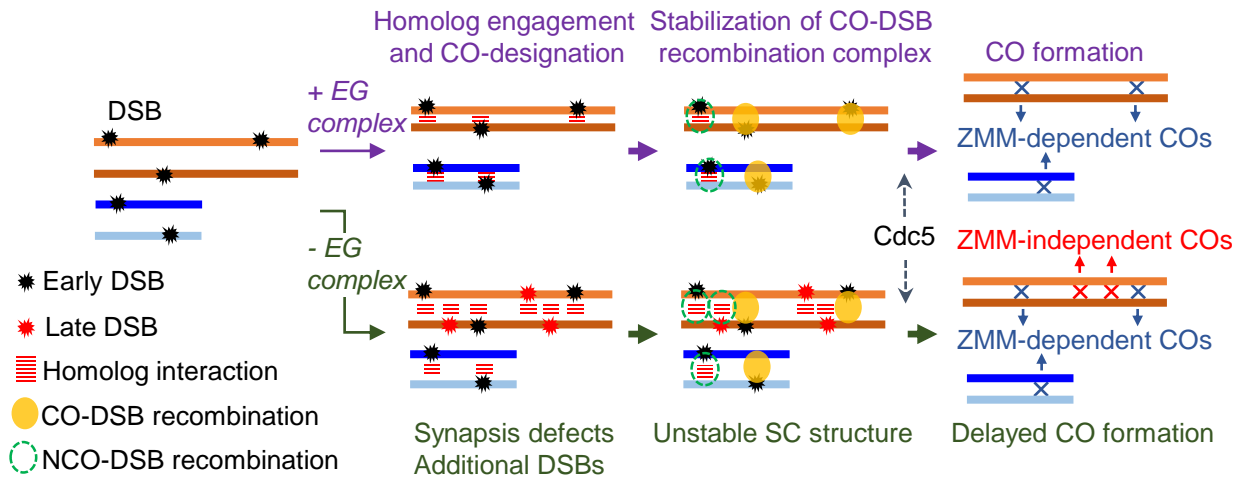

B

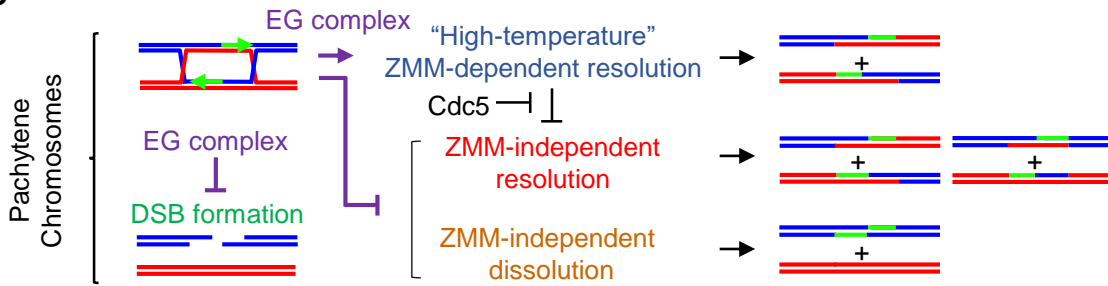

Source: https://biorxiv.org/content/10.1101/2020.07.10.198168v1.full.pdf
